# Fast DNA Serotyping and Antimicrobial Resistance Gene Determination of *Salmonella enterica* with an Oligonucleotide Microarray-Based Assay

Sascha D. Braun<sup>1\*</sup>, Albrecht Ziegler<sup>1</sup>, Ulrich Methner<sup>2</sup>, Peter Slickers<sup>1</sup>, Silke Keiling<sup>2</sup>, Stefan Monecke<sup>1,3</sup>, Ralf Ehricht<sup>1</sup>

**1** Alere Technologies GmbH, Jena, Germany, **2** Institute of Bacterial Infections and Zoonoses at the Friedrich-Loeffler-Institute, Federal Research Institute for Animal Health, Jena, Germany, **3** Institute for Medical Microbiology and Hygiene, Technical University of Dresden, Dresden, Germany

## Abstract

Salmonellosis caused by *Salmonella* (*S.*) belongs to the most prevalent food-borne zoonotic diseases throughout the world. Therefore, serotype identification for all culture-confirmed cases of *Salmonella* infection is important for epidemiological purposes. As a standard, the traditional culture method (ISO 6579:2002) is used to identify *Salmonella*. Classical serotyping takes 4–5 days to be completed, it is labor-intensive, expensive and more than 250 non-standardized sera are necessary to characterize more than 2,500 *Salmonella* serovars currently known. These technical difficulties could be overcome with modern molecular methods. We developed a microarray based serogenotyping assay for the most prevalent *Salmonella* serovars in Europe and North America. The current assay version could theoretically discriminate 28 O-antigens and 86 H-antigens. Additionally, we included 77 targets analyzing antimicrobial resistance genes. The *Salmonella* assay was evaluated with a set of 168 reference strains representing 132 serovars previously serotyped by conventional agglutination through various reference centers. 117 of 132 (81%) tested serovars showed a unique microarray pattern. 15 of 132 serovars generated a pattern which was shared by multiple serovars (e.g., *S. ser. Enteritidis* and *S. ser. Nitra*). These shared patterns mainly resulted from the high similarity of the genotypes of serogroup A and D1. Using patterns of the known reference strains, a database was built which represents the basis of a new PatternMatch software that can serotype unknown *Salmonella* isolates automatically. After assay verification, the *Salmonella* serogenotyping assay was used to identify a field panel of 105 *Salmonella* isolates. All were identified as *Salmonella* and 93 of 105 isolates (88.6%) were typed in full concordance with conventional serotyping. This microarray based assay is a powerful tool for serogenotyping.

**Citation:** Braun SD, Ziegler A, Methner U, Slickers P, Keiling S, et al. (2012) Fast DNA Serotyping and Antimicrobial Resistance Gene Determination of *Salmonella enterica* with an Oligonucleotide Microarray-Based Assay. PLoS ONE 7(10): e46489. doi:10.1371/journal.pone.0046489

**Editor:** Axel Cloeckert, Institut National de la Recherche Agronomique, France

**Received:** June 12, 2012; **Accepted:** September 4, 2012; **Published:** October 4, 2012

**Copyright:** © 2012 Braun et al. This is an open-access article distributed under the terms of the Creative Commons Attribution License, which permits unrestricted use, distribution, and reproduction in any medium, provided the original author and source are credited.

**Funding:** Funding was provided by Alere Technologies GmbH (<http://alere-technologies.com/>). The funders had no role in study design, data collection and analysis, decision to publish, or preparation of the manuscript.

**Competing Interests:** The authors received funding from a commercial source (Alere Technologies GmbH). Some of the authors have an affiliation to the commercial funders of this research (Alere Technologies GmbH). This does not alter the authors' adherence to all the PLOS ONE policies on sharing data and materials. There are no further patents, products in development or marketed products to declare.

\* E-mail: [sascha.braun@clondiag.com](mailto:sascha.braun@clondiag.com)

## Introduction

Salmonellosis caused by salmonellae belongs to the most prevalent food-borne zoonotic diseases throughout the world [1]. Therefore, serotype identification for all culture-confirmed cases of *Salmonella* infection is important for epidemiological purposes. The genus *Salmonella* includes two species: *Salmonella* (*S.*) *enterica* and *Salmonella bongori*. The species *Salmonella enterica* is divided into the following six subspecies: *S. enterica* subsp. *enterica* (I), *S. enterica* subsp. *salamae* (II), *S. enterica* subsp. *arizonae* (IIIa), *S. enterica* subsp. *diarizonae* (IIIb), *S. enterica* subsp. *houtenae* (IV) and *S. enterica* subsp. *indica* (VI) [2]. The subspecies *Salmonella enterica* subsp. *enterica* (I) includes the most relevant zoonotic pathogens with a global occurrence. A serotyping scheme, proposed by Kauffmann 1934 [3], divides all subspecies into serovars by immunologic analyses of two surface structures, O-polysaccharide (O-antigen) and flagellin protein (H-antigen). The Kauffman-White scheme was expanded from 44 serovars in 1934 to 2,587 serovars currently known [2].

Genes required for the biosynthesis of the O-antigen are organized in the *rfb* cluster [4,5]. Within this cluster, sequences of the sugar transferases are relatively conserved and two genes are responsible for most of the genotypic and phenotypic differences of the 46 *Salmonella* O-serogroups described in the Kauffmann-White scheme. The genes of the O-antigen flippase (*wzx*) and polymerase (*wzy*) are highly variable and specific for their respective serogroup [5,6]. The H-antigen used for serotyping is encoded by two flagellar structure genes; *fliC* (phase 1 flagellin) and *fliB* (phase 2 flagellin). Both genes are highly conserved at their 5' and 3' ends and variable in their central region [7,8]. Most *Salmonella* serovars are diphasic where *fliC* or *fliB* is expressed alternately. Serovars with only one H-phase are considered to be monophasic. Monophasic *Salmonella* could theoretically originate in two different ways. They either might represent ancestral forms which lack the second flagellar antigen and did not yet evolve the necessary switching mechanism. Alternatively, they could be deletion mutants of biphasic salmonellae that have lost either the switching mechanism or the ability to express the second flagellar

antigen [9]. The genetic switching between these two phases is regulated by the *hin* gene, coding for a DNA-invertase [10]. This approximately 900-base pair (bp) DNA fragment adjacent to *fljB*, which specifies the synthesis of the H2 flagellar antigen, can exist in either orientation with respect to *fljB*. The orientation of the inversion region controls the expression of *fljB*, i.e., in one orientation the adjacent *fljB* is expressed and in the opposite orientation *fljB* is not expressed [11].

As a gold standard, the traditional culture method is used to detect *Salmonella* and, since 2002, ISO 6579 represents a legislative norm for the detection of *Salmonella* [12]. This method includes the non-selective pre-enrichment in buffered peptone water followed by selective enrichment and plating on two solid selective media. Colonies of interest are confirmed biochemically and serologically by agglutination with specific sera. However, the procedure according to ISO 6579:2002 takes 4–5 days to be completed. Additionally, classical serotyping is labor-intensive, expensive, requires highly experienced laboratory staff and more than 250 reagents [13] that are necessary to characterize more than 2,500 *Salmonella* serovars currently listed. Besides, commercially available sera are not standardized and their availability is often limited due to a lack of resources and funding. In contrast, genotyping methods use DNA sequence information for identification. Such sequence information is unique and techniques can easily be reproduced and standardized between different laboratories. For this reason, there is an increasing need for a simple genotyping method that does not require a stock of different sera, but can be performed automatically in high throughput and for which reagents are available worldwide. Different molecular typing systems have been developed to meet this demand, such as multiplex real time PCR [14,15], primer extension [16], microarrays [13,17], DNA sequence approaches [18], bead-based suspension arrays [19,20] and ligation based microarrays [21]. Some recent molecular techniques have the disadvantage that only a small subset of serotypes can be typed whereas other approaches do not provide an antigenic formula compatible with the Kauffmann-White scheme. Some techniques are too expensive and/or labor intensive to be implemented in public health or diagnostic laboratories.

Ballmer et al (2007) proposed a genotyping microarray for *Escherichia (E.) coli* [6]. Using a comparable system we aim to develop a high throughput, economical, array-based system to serotype *Salmonella* via its genotype. The microarray includes 255 different targets to analyze O- and H-phases and assign the genotype to the antigenic formula according to the Kauffmann-White scheme. Additionally, we included 77 targets related to antimicrobial resistance (AMR). Validation and testing of the array was completed with 132 different *Salmonella* serovars, including the most prevalent *Salmonella* serovars from human and non-human sources from North America and Europe ([1], [www.cdc.gov/nceid/dfwed/PDFs/SalmonellaAnnualSummaryTables2009.pdf](http://www.cdc.gov/nceid/dfwed/PDFs/SalmonellaAnnualSummaryTables2009.pdf)) to ensure the development of a comprehensive assay with a global scope.

## Methods

### Bacterial strains, growth conditions, and genomic DNA extraction

The microarray based assay was evaluated with a set of 168 reference strains representing 132 serovars previously serotyped by conventional agglutination through various reference centers, including the Centers for Disease Control and Prevention (CDC, Atlanta, USA), German Collection of Microorganism and Cell Cultures (DSMZ, Brunswick, Germany), Salmonella Genetic Stock Center (SGSC, Calgary, Canada) and National Reference

Laboratory for Salmonellosis in Cattle at the Friedrich-Loeffler-Institute (FLI, Jena, Germany) (Table 1). For the *S. serovar* (ser.) Typhimurium strain LT2, the complete genome sequence (GenBank NC\_003197.1), the antigenic formula and a theoretical prediction of the microarray hybridization pattern (which was generated using a probe-matching matrix; see Table S1), were available. The strains were cultivated on tryptone yeast agar, and genomic DNA was extracted using a Roche High Pure PCR Template Preparation Kit (Roche Diagnostics, Germany) or a Qiagen DNeasy Blood & Tissue Kit (Qiagen GmbH, Hilden, Germany) according to manufacturer's instructions after treatment with lysis enhancer (Alere Technologies, Germany). If necessary, DNA was concentrated to at least 100 ng/μl using a SpeedVac centrifuge (Eppendorf, Hamburg, Germany) at room temperature for 30 min/1,400 rpm.

### Array design

Discrimination of the 46 described O-serotypes is mainly determined by the genes *wzy* (polymerase) and *wzx* (flippase). The 114 known H-antigens are encoded by two genes; *fliC* (phase 1 flagellin) and *fljB* (phase 2 flagellin). The resulting 24- to 34-bp primer and oligonucleotide probes for serogenotyping were selected from variable parts of multiple sequence alignments for these determinative genes aiming to be as discriminating as possible and to contain similar G+C contents to ensure a very similar hybridization behavior. 255 serotyping probes were designed by analyzing all available annotated GenBank sequences (NCBI, <http://www.ncbi.nlm.nih.gov/>) related to the genes *wzx* and *wzy* as well as *fliC* and *fljB*. Additionally, the genes *manC* (O7, O11, O18, O40, O41), *wbuH* (O41, O62), *weiB* (O66), and *rflV* (O4) were used to discriminate O-serotypes (Table 2). The probes immobilized on the current array version can discriminate 28 O-antigens: A (O:2), B (O:4), C1 (O:7), C2–C3 (O:8), D1 (O:9), D2 (O:9,46), E1/E4 (O:3,10/O:1,3,19), F (O:11), G (O:13), H (O:6,14), I (O:16), J (O:17), K (O:18), M (O:28), N (O:30), O (O:35), P (O:38), Q (O:39), R (O:40), S (O:41), U (O:43), W (O:45), Z (O:50), O55, O56, O58, O62 and O66. From this set, 19 serogroups (A, B, C1, C2–C3, D1, D2, E1, E4, F, G, H, I, K, M, N, O, P, T, U) were tested on the microarray using the 132 reference serovars (Table 1). Due to the high similarity between the serogroups A and D1, additional probes were designed to discriminate *S. ser.* Nitra and *S. ser.* Enteritidis. For this purpose, specific probes located in the genes *lygA*, *lygD*, *sefA*, *sefB* and *sefC* were designed to specifically identify *S. ser.* Enteritidis (Table 2). In order to identify *S. ser.* Paratyphi A, probes were designed to target the intergenic region SSPAI, a genomic island next to *clpA* [22]. For the discrimination of *S. ser.* Dublin from *S. ser.* Kiel, the genes *SeD\_A1100*, *SeD\_A1101* and *SeD\_A1102* were used as they code for a conserved putative protein being specific for serovar Dublin [23].

Flagellar probes were designed using distinctive antigenic sequences within phase 1 (*fliC*) and phase 2 (*fljB*) flagellar genes (Table 2). The following flagellar antigens can be identified on the array: a; b; c; d; e,h; e,n,x; e,n,x,z15; f,g; f,g,m,t; f,g,s; [f].g.[t]; f,g,t; g.[s].t; g,m; g,m,[p].s; g,m,[t]; g,m,q; g,m,s; g,m,s,t; g,m,t; g,p; g,p,s; g,p,u; g,q; g,s,t; g,t; g,z51; g,z62; i; j; k; (k); l,v; l,w; l,z13; l,z13,z28; l,z28; m,p,t,[u]; m,t; r; r,[i]; y; z; z10; z29; z35; z36; z36,z38; z38; z39; z4,z23; z4,z23,z32; z4,z24; z4,z32; z41; z44; z47; z52; z58; z6; z65; z69; z81; z91; 1,11 (AY353292); 1,16 (AY353263); 1,2; 1,[2],7; 1,2,7; 1,5; 1,5,(7); 1,5,7; 1,6; 1,7; e,n,x; e,n,x,z15; e,n,z15; k; l,w; l,z13,z28z; z10; z35; z39; z41; z50 and z6. Additionally, probes specifying *invA* [24], *galF* (this study) and *manC* (this study) that were introduced to confirm the identity of *Salmonella* and to serve as controls. These controls were always positive

**Table 1.** *Salmonella* strains used to validate the *Salmonella* serogenotyping array.

| Species              | Serovar        | Strain                                                                 | Results of classical Serotyping |                        | Results of microarray based Serotyping |                       |           | Unique Pattern              | Pattern similar to Serovars |
|----------------------|----------------|------------------------------------------------------------------------|---------------------------------|------------------------|----------------------------------------|-----------------------|-----------|-----------------------------|-----------------------------|
|                      |                |                                                                        | Serogroup                       | Antigenic Formula      | Serogroup                              | <i>invA/galF/manC</i> | Serogroup |                             |                             |
| <i>S.e. enterica</i> | Paratyphi A    | CDC1                                                                   | A (O:2)                         | 1,2,12:a:[1,5]         | A (O:2)                                | + / + / +             | Yes       |                             |                             |
| <i>S.e. enterica</i> | Nitra          | CDC1280                                                                | A (O:2)                         | 2,12:g,m:-             | A (O:2)                                | + / + / +             | No        | Enteritidis, Blegdam        |                             |
| <i>S.e. enterica</i> | Kiel           | CDC09-1879;<br>CDC674                                                  | A (O:2)                         | 1,2,12:g,p:-           | A (O:2)                                | + / + / +             | No        | Dublin, Naestved,<br>Moscow |                             |
| <i>S.e. enterica</i> | Koessen        | CDC2417                                                                | A (O:2)                         | 2,12;v:1,5             | A (O:2)                                | + / + / +             | No        | Panama                      |                             |
| <i>S.e. enterica</i> | Abony          | CDC103;<br>DSM4224                                                     | B (O:4)                         | 1,4,[5],12,[27]b:e,n,x | B (O:4)                                | + / + / +             | Yes       |                             |                             |
| <i>S.e. enterica</i> | Paratyphi B    | CDC3                                                                   | B (O:4)                         | 1,4,[5],12:b:1,2       | B (O:4)                                | + / + / +             | Yes       |                             |                             |
| <i>S.e. enterica</i> | Wien           | SGSC2528                                                               | B (O:4)                         | 1,4,12,[27]b:i,w       | B (O:4)                                | + / + / +             | Yes       |                             |                             |
| <i>S.e. enterica</i> | Jericho        | CDC621                                                                 | B (O:4)                         | 1,4,12,27:ce,n,z15     | B (O:4)                                | + / + / +             | Yes       |                             |                             |
| <i>S.e. enterica</i> | Duisburg       | SGSC2472                                                               | B (O:4)                         | 1,4,12,[27]d:e,n,z15   | B (O:4)                                | + / + / +             | Yes       |                             |                             |
| <i>S.e. enterica</i> | Schwarzengrund | CDC1629;<br>SGSC2514                                                   | B (O:4)                         | 1,4,12,27:d:1,7        | B (O:4)                                | + / + / +             | Yes       |                             |                             |
| <i>S.e. enterica</i> | Stanley        | CDC000477;<br>SGSC2517                                                 | B (O:4)                         | 1,4,[5],12,[27]d:1,2   | B (O:4)                                | + / + / +             | Yes       |                             |                             |
| <i>S.e. enterica</i> | Chester        | CDC17                                                                  | B (O:4)                         | 1,4,[5],12:e,h,e,n,x   | B (O:4)                                | + / + / +             | Yes       |                             |                             |
| <i>S.e. enterica</i> | Reading        | CDC19;<br>SGSC2510                                                     | B (O:4)                         | 1,4,[5],12:e,h,1,5     | B (O:4)                                | + / + / +             | Yes       |                             |                             |
| <i>S.e. enterica</i> | Saintpaul      | CDC108                                                                 | B (O:4)                         | 1,4,[5],12:e,h:1,2     | B (O:4)                                | + / + / +             | Yes       |                             |                             |
| <i>S.e. enterica</i> | Sandiego       | CDC18                                                                  | B (O:4)                         | 1,4,[5],12:e,h,e,n,z15 | B (O:4)                                | + / + / +             | Yes       |                             |                             |
| <i>S.e. enterica</i> | Derby          | CDC20                                                                  | B (O:4)                         | 1,4,[5],12:f,g:[1,2]   | B (O:4)                                | + / + / +             | Yes       |                             |                             |
| <i>S.e. enterica</i> | Agona          | CDC1636                                                                | B (O:4)                         | 1,4,[5],12:f,g,s:[1,2] | B (O:4)                                | + / + / +             | Yes       |                             |                             |
| <i>S.e. enterica</i> | California     | CDC1109                                                                | B (O:4)                         | 4,12:g,m,t[267]        | B (O:4)                                | + / + / +             | Yes       |                             |                             |
| <i>S.e. enterica</i> | Budapest       | CDC23                                                                  | B (O:4)                         | 1,4,12,[27]g,t:-       | B (O:4)                                | + / + / +             | Yes       |                             |                             |
| <i>S.e. enterica</i> | Travis         | CDC990318                                                              | B (O:4)                         | 4,[5],12:g,z5:1,17     | B (O:4)                                | + / + / +             | Yes       |                             |                             |
| <i>S.e. enterica</i> | 1,4,[5],12:i:- | CDCQA126;<br>NRL688; NRL813                                            | B (O:4)                         | 1,4,[5],12:i:-         | B (O:4)                                | + / + / +             | Yes       |                             |                             |
| <i>S.e. enterica</i> | Agama          | CDC513                                                                 | B (O:4)                         | 4,12:i:1,6             | B (O:4)                                | + / + / +             | Yes       |                             |                             |
| <i>S.e. enterica</i> | Gloucester     | CDC443                                                                 | B (O:4)                         | 1,4,12,27:i:l,w        | B (O:4)                                | + / + / +             | Yes       |                             |                             |
| <i>S.e. enterica</i> | Typhimurium    | CDC14; DSM10506;<br>DSM17058;<br>DSM17058;<br>DSM19587;<br>DSM554; LT2 | B (O:4)                         | 1,4,[5],12:i:1,2       | B (O:4)                                | + / + / +             | Yes       |                             |                             |
| <i>S.e. enterica</i> | Brandenburg    | CDC2519;<br>SGSC2460                                                   | B (O:4)                         | 4,[5],12:l,v:e,n,z15   | B (O:4)                                | + / + / +             | Yes       |                             |                             |
| <i>S.e. enterica</i> | Bredeney       | CDC112                                                                 | B (O:4)                         | 1,4,12,27;l:v:1,7      | B (O:4)                                | + / + / +             | Yes       |                             |                             |

**Table 1. Cont.**

| Species                | Serovar      | Strain           | Results of classical Serotyping |                              | Results of microarray based Serotyping |                        |           | Unique Pattern | Pattern similar to Serovars |
|------------------------|--------------|------------------|---------------------------------|------------------------------|----------------------------------------|------------------------|-----------|----------------|-----------------------------|
|                        |              |                  | Serogroup                       | Antigenic Formula            | Serogroup                              | <i>invA/ga/Fl manC</i> | Serogroup |                |                             |
| <i>S.e. enterica</i>   | Heidelberg   | CDC16; DSM9379   | B (O:4)                         | 1,4,[5],12:r:1,2             | B (O:4)                                | + / + / +              | Yes       |                |                             |
| <i>S.e. enterica</i>   | Indiana      | CDC377; SG5C2482 | B (O:4)                         | 1,4,12:z:1,7                 | B (O:4)                                | + / + / +              | No        | Kiambu         |                             |
| <i>S.e. enterica</i>   | Kiambu       | CDC399           | B (O:4)                         | 1,4,12:z:1,5                 | B (O:4)                                | + / + / +              | No        | Indiana        |                             |
| <i>S.e. enterica</i>   | Haifa        | SG5C2479         | B (O:4)                         | 1,4,[5],12:z:10:1,2          | B (O:4)                                | + / + / +              | Yes       |                |                             |
| <i>S.e. enterica</i>   | Stanleyville | CDC223; SG5C2518 | B (O:4)                         | 1,4,[5],12,[27]z:4,z23:[1,2] | B (O:4)                                | + / + / +              | Yes       |                |                             |
| <i>S.e. enterica</i>   | Maska        | CDC2349          | B (O:4)                         | 1,4,12,27:z41:e,n,z15        | B (O:4)                                | + / + / +              | Yes       |                |                             |
| <i>S.e. enterica</i>   | Ohio         | CDC710           | C1 (O:7)                        | 6,7,14:bljw                  | C1 (O:7)                               | + / + / +              | Yes       |                |                             |
| <i>S.e. enterica</i>   | Choleraesuis | CDC34; DSM14846  | C1 (O:7)                        | 6,7:c:1,5                    | C1 (O:7)                               | + / + / +              | Yes       |                |                             |
| <i>S.e. enterica</i>   | Paratyphi C  | CDC33; SG5C3592  | C1 (O:7)                        | 6,7,[v]c:1,5                 | C1 (O:7)                               | + / + / +              | Yes       |                |                             |
| <i>S.e. enterica</i>   | Typhisuis    | SG5C2527         | C1 (O:7)                        | 6,7:c:1,5                    | C1 (O:7)                               | + / + / +              | Yes       |                |                             |
| <i>S.e. enterica</i>   | Kambole      | CDC1863          | C1 (O:7)                        | 6,7:d:1,[2],7                | C1 (O:7)                               | + / + / +              | Yes       |                |                             |
| <i>S.e. enterica</i>   | Livingstone  | NRL720           | C1 (O:7)                        | 6,7,14:dljw                  | C1 (O:7)                               | + / + / +              | Yes       |                |                             |
| <i>S.e. enterica</i>   | Braenderup   | CDC49            | C1 (O:7)                        | 6,7,14:e,he,n,z15            | C1 (O:7)                               | + / + / +              | Yes       |                |                             |
| <i>S.e. enterica</i>   | Nola         | CDC2206          | C1 (O:7)                        | 6,7:e:h:1,7                  | C1 (O:7)                               | + / + / +              | Yes       |                |                             |
| <i>S.e. enterica</i>   | Rissen       | CDC955           | C1 (O:7)                        | 6,7,14:fg:-                  | C1 (O:7)                               | + / + / +              | Yes       |                |                             |
| <i>S.e. enterica</i>   | Montevideo   | CDC1904          | C1 (O:7)                        | 6,7,14:g,m,[p],s:[1,2,7]     | C1 (O:7)                               | + / + / +              | Yes       |                |                             |
| <i>S.e. enterica</i>   | Singapore    | CDC010011        | C1 (O:7)                        | 6,7:ke,n,x                   | C1 (O:7)                               | + / + / +              | Yes       |                |                             |
| <i>S.e. enterica</i>   | Thompson     | CDC000342        | C1 (O:7)                        | 6,7,14:k:1,5                 | C1 (O:7)                               | + / + / +              | Yes       |                |                             |
| <i>S.e. diarizonae</i> | 6,7,l,y:z53  | DSM14847         | C1 (O:7)                        | 6,7,l,y:z53                  | C1 (O:7)                               | + / + / +              | Yes       |                |                             |
| <i>S.e. enterica</i>   | Bonn         | CDC344           | C1 (O:7)                        | 6,7,l,y:e,n,x                | C1 (O:7)                               | + / + / +              | Yes       |                |                             |
| <i>S.e. enterica</i>   | Potsdam      | CDC876           | C1 (O:7)                        | 6,7,14:l,y:e,n,z15           | C1 (O:7)                               | + / + / +              | Yes       |                |                             |
| <i>S.e. enterica</i>   | Kenya        | CDC497           | C1 (O:7)                        | 6,7,l,z13:e,n,x              | C1 (O:7)                               | + / + / +              | Yes       |                |                             |
| <i>S.e. enterica</i>   | Haelisborg   | CDC586           | C1 (O:7)                        | 6,7:m,p,t,[u]:-              | C1 (O:7)                               | + / + / +              | Yes       |                |                             |
| <i>S.e. enterica</i>   | Oranienburg  | CDC1271          | C1 (O:7)                        | 6,7,14:m,t:[z57]             | C1 (O:7)                               | + / + / +              | Yes       |                |                             |
| <i>S.e. enterica</i>   | Infantis     | CDC1428          | C1 (O:7)                        | 6,7,14:r:1,5                 | C1 (O:7)                               | + / + / +              | Yes       |                |                             |
| <i>S.e. enterica</i>   | Virchow      | CDC2688          | C1 (O:7)                        | 6,7,14:r:1,2                 | C1 (O:7)                               | + / + / +              | Yes       |                |                             |
| <i>S.e. enterica</i>   | Bareilly     | NRL608           | C1 (O:7)                        | 6,7,14:y:1,5                 | C1 (O:7)                               | + / + / +              | Yes       |                |                             |
| <i>S.e. enterica</i>   | Mbandaka     | CDC1906          | C1 (O:7)                        | 6,7,14:z10:e,n,z15           | C1 (O:7)                               | + / + / +              | Yes       |                |                             |
| <i>S.e. enterica</i>   | Tennessee    | CDC155           | C1 (O:7)                        | 6,7,14:z29:[1,2,7]           | C1 (O:7)                               | + / + / +              | Yes       |                |                             |
| <i>S.e. enterica</i>   | Tienba       | CDC2425          | C1 (O:7)                        | 6,7:z35:1,6                  | C1 (O:7)                               | + / + / +              | Yes       |                |                             |
| <i>S.e. enterica</i>   | Lille        | CDC354           | C1 (O:7)                        | 6,7,14:z38:-                 | C1 (O:7)                               | + / + / +              | Yes       |                |                             |
| <i>S.e. enterica</i>   | Manhattan    | CDC122           | C2-C3 (O:8)                     | 6,8:dt:1,5                   | C2-C3 (O:8)                            | + / + / +              | Yes       |                |                             |
| <i>S.e. enterica</i>   | Muenchen     | CDC54; SG5C2243  | C2-C3 (O:8)                     | 6,8:dt:1,2                   | C2-C3 (O:8)                            | + / + / +              | Yes       |                |                             |

**Table 1. Cont.**

| Species              | Serovar          | Strain                                          | Results of classical Serotyping |                        | Results of microarray based Serotyping |                       |           | Unique Pattern         | Pattern similar to Serovars |
|----------------------|------------------|-------------------------------------------------|---------------------------------|------------------------|----------------------------------------|-----------------------|-----------|------------------------|-----------------------------|
|                      |                  |                                                 | Serogroup                       | Antigenic Formula      | Serogroup                              | <i>invA/gaFI/manC</i> | Serogroup |                        |                             |
| <i>S.e. enterica</i> | Virginia         | CDC189                                          | C2-C3 (O:8)                     | 8:d:1,2                | C2-C3 (O:8)                            | + / + / +             | Yes       |                        |                             |
| <i>S.e. enterica</i> | Kottbus          | CDC52                                           | C2-C3 (O:8)                     | 6,8:e,h:1,5            | C2-C3 (O:8)                            | + / + / +             | Yes       |                        |                             |
| <i>S.e. enterica</i> | Newport          | CDC2434                                         | C2-C3 (O:8)                     | 6,8,20:e,h:1,2         | C2-C3 (O:8)                            | + / + / +             | Yes       |                        |                             |
| <i>S.e. enterica</i> | Emek             | SGC2477                                         | C2-C3 (O:8)                     | 8,20:g,m,s:-           | C2-C3 (O:8)                            | + / + / +             | Yes       |                        |                             |
| <i>S.e. enterica</i> | Kentucky         | CDC2590; Eng196 <sup>b</sup>                    | C2-C3 (O:8)                     | 8,20:iz6               | C2-C3 (O:8)                            | + / + / +             | Yes       |                        |                             |
| <i>S.e. enterica</i> | Lindenbug        | CDC334                                          | C2-C3 (O:8)                     | 6,8:i:1,2              | C2-C3 (O:8)                            | + / + / +             | Yes       |                        |                             |
| <i>S.e. enterica</i> | Blockley         | CDC448; Eng23 <sup>b</sup> ; Eng24 <sup>b</sup> | C2-C3 (O:8)                     | 6,8:k:1,5              | C2-C3 (O:8)                            | + / + / +             | Yes       |                        |                             |
| <i>S.e. enterica</i> | Litchfield       | CDC000462                                       | C2-C3 (O:8)                     | 6,8:l,v:1,2            | C2-C3 (O:8)                            | + / + / +             | Yes       |                        |                             |
| <i>S.e. enterica</i> | Manchester       | Eng205 <sup>b</sup>                             | C2-C3 (O:8)                     | 6,8:l,v:1,7            | C2-C3 (O:8)                            | + / + / +             | Yes       |                        |                             |
| <i>S.e. enterica</i> | Breukelen        | CDC1699                                         | C2-C3 (O:8)                     | 6,8:l,z13,[z28]e,n,z15 | C2-C3 (O:8)                            | + / + / +             | Yes       |                        |                             |
| <i>S.e. enterica</i> | Goldcoast        | NRL852                                          | C2-C3 (O:8)                     | 6,8:r:l,w              | C2-C3 (O:8)                            | + / + / +             | Yes       |                        |                             |
| <i>S.e. enterica</i> | Bovismorbificans | CDC2201                                         | C2-C3 (O:8)                     | 6,8,20:r,[i]:1,5       | C2-C3 (O:8)                            | + / + / +             | Yes       |                        |                             |
| <i>S.e. enterica</i> | Hidalgo          | CDC2359                                         | C2-C3 (O:8)                     | 6,8:r,[i]e,n,z15       | C2-C3 (O:8)                            | + / + / +             | Yes       | Istanbul               |                             |
| <i>S.e. enterica</i> | Hadar            | CDC347;                                         | C2-C3 (O:8)                     | 6,8:z10:e,n,x          | C2-C3 (O:8)                            | + / + / +             | No        | Hadar                  |                             |
| <i>S.e. enterica</i> | Istanbul         | CDC1466                                         | C2-C3 (O:8)                     | 8:z10:e,n,x            | C2-C3 (O:8)                            | + / + / +             | No        |                        |                             |
| <i>S.e. enterica</i> | Uno              | CDC1697                                         | C2-C3 (O:8)                     | 6,8:z29:[e,n,z15]      | C2-C3 (O:8)                            | + / + / +             | Yes       |                        |                             |
| <i>S.e. enterica</i> | Convallis        | CDC1770                                         | C2-C3 (O:8)                     | 8,20:z4,z23:[z6]       | C2-C3 (O:8)                            | + / + / +             | Yes       |                        |                             |
| <i>S.e. enterica</i> | Duesseldorf      | CDC130                                          | C2-C3 (O:8)                     | 6,8:z4,z24:-           | C2-C3 (O:8)                            | + / + / +             | Yes       |                        |                             |
| <i>S.e. enterica</i> | Tallahassee      | CDC196                                          | C2-C3 (O:8)                     | 6,8:z4,z32:-           | C2-C3 (O:8)                            | + / + / +             | Yes       |                        |                             |
| <i>S.e. enterica</i> | Gallinarum       | CDC74; DSM13674                                 | D1 (O:9)                        | 1,9,12:-:-             | D1 (O:9)                               | + / + / +             | Yes       |                        |                             |
| <i>S.e. enterica</i> | Berta            | CDC69                                           | D1 (O:9)                        | 1,9,12:[f],g,[t]:-     | D1 (O:9)                               | + / + / +             | Yes       |                        |                             |
| <i>S.e. enterica</i> | Miami            | CDC198; SGC2485                                 | D1 (O:9)                        | 1,9,12:a:1,5           | D1 (O:9)                               | + / + / +             | Yes       |                        |                             |
| <i>S.e. enterica</i> | Goeteborg        | CDC696                                          | D1 (O:9)                        | 9,12:c:1,5             | D1 (O:9)                               | + / + / +             | Yes       |                        |                             |
| <i>S.e. enterica</i> | Typhi            | No. 1 <sup>c</sup>                              | D1 (O:9)                        | 9,12[V]:jd:-           | D1 (O:9)                               | + / + / +             | Yes       |                        |                             |
| <i>S.e. enterica</i> | Enteritidis      | CDC64; DSM14221; DSM17420                       | D1 (O:9)                        | 1,9,12:g,m:-           | D1 (O:9)                               | + / + / +             | No        | Nitra, Blegdam         |                             |
| <i>S.e. enterica</i> | Blegdam          | CDC090361; CDC68                                | D1 (O:9)                        | 9,12:g,m,q:-           | D1 (O:9)                               | + / + / +             | No        | Nitra, Enteritidis     |                             |
| <i>S.e. enterica</i> | Dublin           | CDC10-0635; CDC65                               | D1 (O:9)                        | 1,9,12[V]:j,g,p:-      | D1 (O:9)                               | + / + / +             | No        | Kiel, Naestved, Moscow |                             |
| <i>S.e. enterica</i> | Naestved         | CDC559; SGC3612                                 | D1 (O:9)                        | 1,9,12:j,p,s:-         | D1 (O:9)                               | + / + / +             | No        | Kiel, Dublin, Moscow   |                             |
| <i>S.e. enterica</i> | Moscow           | CDC67                                           | D1 (O:9)                        | 1,9,12:g,q:-           | D1 (O:9)                               | + / + / +             | No        | Kiel, Dublin, Naestved |                             |

**Table 1. Cont.**

| Species              | Serovar      | Strain             | Results of classical Serotyping |                           | Results of microarray based Serotyping |                                         |           | Unique Pattern | Pattern similar to Serovars |
|----------------------|--------------|--------------------|---------------------------------|---------------------------|----------------------------------------|-----------------------------------------|-----------|----------------|-----------------------------|
|                      |              |                    | Serogroup                       | Antigenic Formula         | Serogroup                              | <i>invI</i> / <i>galI</i> / <i>manC</i> | Serogroup |                |                             |
| <i>S.e. enterica</i> | Panama       | CDC73;<br>SGSC2496 | D1 (O:9)                        | 1,9,12:1,v:1,5            | D1 (O:9)                               |                                         | + / + / + | No             | Koessen                     |
| <i>S.e. salamae</i>  | 91,w,e,n,x   | DSM9220            | D1 (O:9)                        | 91,w,e,n,x                | D1 (O:9)                               |                                         | + / + / + | Yes            |                             |
| <i>S.e. enterica</i> | Javiana      | CDC146             | D1 (O:9)                        | 1,9,12:1,z28:1,5          | D1 (O:9)                               |                                         | + / + / + | Yes            |                             |
| <i>S.e. enterica</i> | Ottawa       | CDC1934            | D1 (O:9)                        | 1,9,12-z41:1,5            | D1 (O:9)                               |                                         | + / + / + | Yes            |                             |
| <i>S.e. enterica</i> | Franken      | CDC2570            | D1 (O:9)                        | 9,12-z6-z67               | D1 (O:9)                               |                                         | + / + / + | Yes            |                             |
| <i>S.e. enterica</i> | Fresno       | CDC1412            | D2 (O:9,46)                     | 9,46-z38-                 | D2 (O:9,46)                            |                                         | + / + / + | Yes            |                             |
| <i>S.e. enterica</i> | Anatum       | CDC78              | E1 (O:3,10)                     | 3,{10}{15}{15,34}:e,h:1,6 | E1 (O:3,10)                            |                                         | + / + / + | Yes            |                             |
| <i>S.e. enterica</i> | Meleagridis  | NRL737             | E1 (O:3,10)                     | 3,{10}{15}{15,34}:e,h:l,w | E1 (O:3,10)                            |                                         | + / + / + | Yes            |                             |
| <i>S.e. enterica</i> | Muenster     | CDC79              | E1 (O:3,10)                     | 3,{10}{15}{15,34}:e,h:1,5 | E1 (O:3,10)                            |                                         | + / + / + | Yes            |                             |
| <i>S.e. enterica</i> | Amsterdam    | CDC070756          | E1 (O:3,10)                     | 3,{10}{15}{15,34}:g,m,s:- | E1 (O:3,10)                            |                                         | + / + / + | Yes            |                             |
| <i>S.e. enterica</i> | Westhampton  | CDC326             | E1 (O:3,10)                     | 3,{10}{15}{15,34}:g,s,t:- | E1 (O:3,10)                            |                                         | + / + / + | No             | Senftenberg                 |
| <i>S.e. enterica</i> | Bessi        | CDC1999            | E1 (O:3,10)                     | 3,10:i:e,n,x              | E1 (O:3,10)                            |                                         | + / + / + | Yes            |                             |
| <i>S.e. enterica</i> | Give         | CDC495; CDC77      | E1 (O:3,10)                     | 3,{10}{15}{15,34}:l,v:1,7 | E1 (O:3,10)                            |                                         | + / + / + | Yes            |                             |
| <i>S.e. enterica</i> | London       | NRL700             | E1 (O:3,10)                     | 3,{10}{15}:l,v:1,6        | E1 (O:3,10)                            |                                         | + / + / + | Yes            |                             |
| <i>S.e. enterica</i> | Weltevreden  | CDC147             | E1 (O:3,10)                     | 3,{10}{15}rrz6            | E1 (O:3,10)                            |                                         | + / + / + | Yes            |                             |
| <i>S.e. enterica</i> | Orion        | CDC321             | E1 (O:3,10)                     | 3,{10}{15}{15,34}:yr1,5   | E1 (O:3,10)                            |                                         | + / + / + | Yes            |                             |
| <i>S.e. enterica</i> | Pietersburg  | CDC2258            | E1 (O:3,10)                     | 3,{10}{15,34}:z69:1,7     | E1 (O:3,10)                            |                                         | + / + / + | Yes            |                             |
| <i>S.e. enterica</i> | Senftenberg  | CDC87; DSM10062    | E4 (O:1,3,19)                   | 1,3,19:g,[s]:t-           | E4 (O:1,3,19)                          |                                         | + / + / + | No             | Westhampton                 |
| <i>S.e. enterica</i> | Westerstede  | CDC607             | E4 (O:1,3,19)                   | 1,3,19:l,z13:1,2          | E4 (O:1,3,19)                          |                                         | + / + / + | Yes            |                             |
| <i>S.e. enterica</i> | Missouri     | CDC2309            | F (O:11)                        | 11:g,s,t-                 | F (O:11)                               |                                         | + / + / + | Yes            |                             |
| <i>S.e. enterica</i> | Connecticut  | CDC2392            | F (O:11)                        | 11:l,z13:z28:1,5          | F (O:11)                               |                                         | + / + / + | Yes            |                             |
| <i>S.e. enterica</i> | Rubislaw     | CDC102; SGSC2511   | F (O:11)                        | 11:r:e,n,x                | F (O:11)                               |                                         | + / + / + | Yes            |                             |
| <i>S.e. enterica</i> | Mississippi  | CDC154             | G (O:13)                        | 1,13,23:b:1,5             | G (O:13)                               |                                         | + / + / + | Yes            |                             |
| <i>S.e. enterica</i> | Havana       | NRL607             | G (O:13)                        | 1,13,23:f,g,[s]:-         | G (O:13)                               |                                         | + / + / + | Yes            |                             |
| <i>S.e. enterica</i> | Idikan       | CDC1690            | G (O:13)                        | 1,13,23:i:1,5             | G (O:13)                               |                                         | + / + / + | Yes            |                             |
| <i>S.e. enterica</i> | Kedougou     | CDC1523            | G (O:13)                        | 1,13,23:i:l,w             | G (O:13)                               |                                         | + / + / + | Yes            |                             |
| <i>S.e. enterica</i> | Poona        | CDC1243            | G (O:13)                        | 1,13,22:z:1,6             | G (O:13)                               |                                         | + / + / + | Yes            |                             |
| <i>S.e. enterica</i> | Cubana       | CDC207             | G (O:13)                        | 1,13,23:z29:-             | G (O:13)                               |                                         | + / + / + | Yes            |                             |
| <i>S.e. enterica</i> | Ajiobo       | CDC527             | G (O:13)                        | 13,23:z4,z23:-            | G (O:13)                               |                                         | + / + / + | Yes            |                             |
| <i>S.e. indica</i>   | 6,14:a:e,n,x | DSM14848           | G (O:13)                        | 6,14:a:e,n,x              | G (O:13)                               |                                         | + / + / + | Yes            |                             |
| <i>S.e. enterica</i> | Blijdorp     | CDC765             | H (O:6,14)                      | 1,6,14,25:c:1,5           | H (O:6,14)                             |                                         | + / + / + | Yes            |                             |
| <i>S.e. enterica</i> | Carrau       | CDC93              | H (O:6,14)                      | 6,14,[24]:y:1,7           | H (O:6,14)                             |                                         | + / + / + | Yes            |                             |
| <i>S.e. enterica</i> | Grancanaria  | CDC2506            | I (O:16)                        | 16z39:[1,6]               | I (O:16)                               |                                         | + / + / + | Yes            |                             |

**Table 1.** Cont.

| Species              | Serovar       | Strain    | Results of classical Serotyping |                      | Results of microarray based Serotyping |                                                      |           | Unique Pattern | Pattern similar to Serovars |
|----------------------|---------------|-----------|---------------------------------|----------------------|----------------------------------------|------------------------------------------------------|-----------|----------------|-----------------------------|
|                      |               |           | Serogroup                       | Antigenic Formula    | Serogroup                              | <i>invA</i> / <i>galF</i> / <i>manC</i> <sup>a</sup> | Serogroup |                |                             |
| <i>S.e. enterica</i> | Cerro         | CDC990087 | K (O:18)                        | 6:1,4,18:z4,z23:1,5] | K (O:18)                               | + / + / +                                            | Yes       |                |                             |
| <i>S.e. enterica</i> | Pomona        | CDC2473A  | M (O:28)                        | 28:y:1,7             | M (O:28)                               | + / + / +                                            | Yes       |                |                             |
| <i>S.e. enterica</i> | Morocco       | CDC694    | N (O:30)                        | 30:l,z13,z28:e,n,z15 | N (O:30)                               | + / + / +                                            | Yes       |                |                             |
| <i>S.e. enterica</i> | Ealing        | CDC745    | O (O:35)                        | 35:g,m,s:-           | O (O:35)                               | + / + / +                                            | Yes       |                |                             |
| <i>S.e. enterica</i> | Alachua       | CDC325    | O (O:35)                        | 35:z4,z23:-          | O (O:35)                               | + / + / +                                            | Yes       |                |                             |
| <i>S.e. enterica</i> | Kasenyi       | NRL878    | P (O:38)                        | 38:e,h:1,5           | P (O:38)                               | + / + / +                                            | Yes       |                |                             |
| <i>S.e. enterica</i> | Lansing       | CDC634    | P (O:38)                        | 38:i:1,5             | P (O:38)                               | + / + / +                                            | Yes       |                |                             |
| <i>S.e. enterica</i> | Inverness     | CDC171    | P (O:38)                        | 38:k:1,6             | P (O:38)                               | + / + / +                                            | Yes       |                |                             |
| <i>S.e. enterica</i> | Gera          | CDC1316   | T (O:42)                        | 1,42:z4,z23:1,6      | T (O:42)                               | + / + / +                                            | Yes       |                |                             |
| <i>S.e. enterica</i> | Niederodewitz | CDC2579   | U (O:43)                        | 43:b:-               | U (O:43)                               | + / + / +                                            | Yes       |                |                             |
| <i>S. bongori</i>    | 66:z41:-      | DSM13774  | O:66                            | 66:z41:-             | O:66                                   | + / + / +                                            | Yes       |                |                             |

<sup>a</sup>*invA*, *galF* and *manC* are species marker for *Salmonella*.

<sup>b</sup>generous gift of Paul Barrow, University of Nottingham Sutton Bonington Campus, UK.

<sup>c</sup>only genomic DNA of *Salmonella* Typhi, generous gift of Rene S. Hendrickson, DTU Food, Denmark.

Strains were classically serotyped by the CDC (Centers of Disease Control and Prevention, Atlanta, USA), DSMZ (German Collection of Microorganism and Cell Cultures, Brunswick, Germany), SGSC (Salmonella Genetic Stock Center, Calgary, Canada) and FLI (National Reference Laboratory for Salmonellosis in cattle at the Friedrich-Loeffler-Institute, Jena, Germany).

doi:10.1371/journal.pone.0046489.t001

**Table 2.** Summary of the potential function(s) on the basis of classical serotyping of each probe immobilized on the microarray.

| Probe              | Potential Function                                                       | Probe                | Potential Function                                                       | Probe                  | Potential function |
|--------------------|--------------------------------------------------------------------------|----------------------|--------------------------------------------------------------------------|------------------------|--------------------|
| hp-3001-FL-1+e,n,x | e,n,x; e,n,x,z15; z6                                                     | hp-3117-FL-l+z39+z52 | z39                                                                      | hp-3219-wzx_O35        | O35                |
| hp-3003-FL-1+e,n,x | 1,5; 1,6; e,n,x; e,n,x,z15; z6                                           | hp-3118-FL-l+z39+z52 | z52                                                                      | hp-3220-wzx_O4         | O4                 |
| hp-3004-FL-1+e,n,x | 1,11,16; 1,12; 1,2; 1,2,7; 1,5; 1,5,7; 1,6; 1,7; z                       | hp-3120-FL-g,z51     | g,z51                                                                    | hp-3221-wzx_O4         | O4                 |
| hp-3005-FL-1+e,n,x | 1,11,16; 1,12; 1,2; 1,2,7; 1,5; 1,5,7; 1,6; 1,7; z                       | hp-3121-FL-g,z51     | g,z51                                                                    | hp-3222-wzx_O4         | O4                 |
| hp-3006-FL-1+e,n,x | 1,11,16; 1,12; 1,2; 1,2,7; 1,5; 1,5,7; 1,6; 1,7; z                       | hp-3124-FL-e,n,x     | e,n,x; e,n,z15                                                           | hp-3223-wzx_O41+62     | O41; O62           |
| hp-3007-FL-1+e,n,x | 1,5; 1,6                                                                 | hp-3125-FL-b+z91     | b; z91                                                                   | hp-3224-wzx_O41+62     | O41; O62           |
| hp-3008-FL-1+e,n,x | 1,2; 1,5; 1,6; e,n,x; e,n,x,z15; z6                                      | hp-3126-FL-b+z91     | b; z91                                                                   | hp-3225-wzx_O50        | O50                |
| hp-3009-FL-1+e,n,x | 1,2; 1,5; 1,6; e,n,x; e,n,x,z15; z6                                      | hp-3128-FL-b+z91     | b; z91                                                                   | hp-3226-wzx_O50        | O50                |
| hp-3012-FL-1+e,n,x | 1,11,16; 1,12; 1,2; 1,2,7; 1,5; 1,5,7; 1,6; 1,7; e,n,x; e,n,x,z15; z; z6 | hp-3129-FL-b+z91     | b; z91                                                                   | hp-3227-wzx_O55        | O55                |
| hp-3013-FL-1+e,n,x | 1,11,16; 1,12; 1,2; 1,2,7; 1,5; 1,5,7; 1,6; 1,7; e,n,x; e,n,x,z15; z; z6 | hp-3130-FL-b+z91     | b; z91                                                                   | hp-3228-wzx_O55        | O55                |
| hp-3014-FL-1+e,n,x | 1,11,16; 1,12; 1,2; 1,2,7; 1,5; 1,5,7; 1,6; 1,7; e,n,x; e,n,x,z15; z; z6 | hp-3134-FL-z         | z6                                                                       | hp-3229-wzx_O56        | O56                |
| hp-3015-FL-1+e,n,x | 1,11,16; 1,12; 1,2; 1,2,7; 1,5; 1,6; 1,7; e,n,x; e,n,x,z15; z; z6        | hp-3135-FL-z         | z6                                                                       | hp-3230-wzx_O56        | O56                |
| hp-3016-FL-c       | c                                                                        | hp-3136-FL-z         | z69                                                                      | hp-3231-wzx_O58        | O58                |
| hp-3017-FL-c       | c                                                                        | hp-3138-FL-z         | z                                                                        | hp-3232-wzx_O58        | O58                |
| hp-3018-FL-d+j     | d                                                                        | hp-3139-FL-z         | z                                                                        | hp-3233-wzx_O6,14      | O6,14              |
| hp-3019-FL-d+j     | d                                                                        | hp-3140-FL-z         | z                                                                        | hp-3234-wzx_O6,14      | O6,14              |
| hp-3020-FL-d+j     | d                                                                        | hp-3141-FL-z         | z50                                                                      | hp-3235-wzx_O66        | O66                |
| hp-3021-FL-d+j     | d; j                                                                     | hp-3142-FL-z         | z; z35                                                                   | hp-3236-wzx_O66        | O66                |
| hp-3022-FL-d+j     | d                                                                        | hp-3144-FL-z         | z50                                                                      | hp-3237-wzx_O7         | O7                 |
| hp-3023-FL-d+j     | d; j                                                                     | hp-3145-FL-z         | z                                                                        | hp-3238-wzx_O7         | O7                 |
| hp-3024-FL-e,h     | e,h                                                                      | hp-3146-FL-z         | z                                                                        | hp-3239-wzx_O7         | O7                 |
| hp-3025-FL-e,h     | e,h                                                                      | hp-3149-FL-l+z39+z52 | z39                                                                      | hp-3240-wzx_O8         | O8                 |
| hp-3026-FL-e,n,x   | e,n,x,z15                                                                | hp-3150-FL-z         | z                                                                        | hp-3241-wzx_O8         | O8                 |
| hp-3027-FL-e,n,x   | e,n,x; e,n,x,z15                                                         | hp-3152-FL-i+r       | i                                                                        | hp-3242-wzy_O13        | O13                |
| hp-3029-FL-g,z51   | g,z51                                                                    | hp-3153-FL-l+z39+z52 | l,v; l,w; l,z13; l,z13,z28; l,z28                                        | hp-3243-wzy_O13        | O13                |
| hp-3032-FL-i+r     | i                                                                        | hp-3154-FL-k+z       | z10                                                                      | hp-3244-wzy_O16        | O16                |
| hp-3033-FL-i+r     | i                                                                        | hp-3155-FL-z4        | z4,z23; z4,z24; z4,z32                                                   | hp-3245-wzy_O16        | O16                |
| hp-3034-FL-i+r     | i                                                                        | hp-3157-FL-1+e,n,x   | 1,11,16; 1,12; 1,2; 1,2,7; 1,5; 1,5,7; 1,6; 1,7; e,n,x; e,n,x,z15; z; z6 | hp-3246-wzy_O17        | O17                |
| hp-3035-FL-i+r     | r                                                                        | hp-3158-FL-1+e,n,x   | 1,11,16; 1,12; 1,2; 1,2,7; 1,5; 1,5,7; 1,6; 1,7; e,n,x; e,n,x,z15; z; z6 | hp-3247-wzy_O17        | O17                |
| hp-3036-FL-i+r     | r                                                                        | hp-3161-FL-1+e,n,x   | 1,5; 1,6                                                                 | hp-3248-wzy_O18        | O18                |
| hp-3038-FL-k+z     | k; z44; z58                                                              | hp-3163-FL-1+e,n,x   | 1,11,16; 1,12; 1,2; 1,2,7; 1,5; 1,5,7; 1,6; 1,7; z                       | hp-3250-wzy_O28_Dakar  | O28 serovar Dakar  |
| hp-3039-FL-k+z     | l,v; z10; z35; z39; z65                                                  | hp-3165-manC         | species marker                                                           | hp-3251-wzy_O28_Dakar  | O28 serovar Dakar  |
| hp-3040-FL-k+z     | z35                                                                      | hp-3166-wbyJ         | O41                                                                      | hp-3252-wzy_O28_Pomona | O28 serovar Pomona |
| hp-3041-FL-k+z     | k                                                                        | hp-3167-wbyJ         | O41                                                                      | hp-3253-wzy_O28_Pomona | O28 serovar Pomona |
| hp-3042-FL-k+z     | k; z41                                                                   | hp-3168-manC-O16+39  | O16; O39                                                                 | hp-3254-wzy_O3,10+9,46 | O3,10; O9,46       |
| hp-3043-FL-k+z     | (k)                                                                      | hp-3169-manC-O16+39  | O16; O39                                                                 | hp-3255-wzy_O3,10+9,46 | O3,10; O9,46       |



**Table 2.** Cont.

| Probe                | Potential Function                                              | Probe                            | Potential Function      | Probe                  | Potential function |
|----------------------|-----------------------------------------------------------------|----------------------------------|-------------------------|------------------------|--------------------|
| hp-3044-FL-z         | z41                                                             | hp-3170-manC-O7                  | O7                      | hp-3256-wzy_O3,10+9,46 | O3,10; O9,46       |
| hp-3045-FL-k+z       | z10                                                             | hp-3171-manC-O7                  | O7                      | hp-3257-wzy_O30        | O30                |
| hp-3046-FL-k+z       | z10                                                             | hp-3172-manC-O11                 | O11                     | hp-3258-wzy_O30        | O30                |
| hp-3047-FL-k+z       | z81                                                             | hp-3173-manC-O11                 | O11                     | hp-3259-wzy_O35        | O35                |
| hp-3048-FL-k+z       | a,z10                                                           | hp-3174-manC-O18                 | O18                     | hp-3260-wzy_O35        | O35                |
| hp-3049-FL-k+z       | z35                                                             | hp-3175-manC-O18                 | O18                     | hp-3261-wzy_O38        | O38                |
| hp-3050-FL-k+z       | k; z58; z44; z41                                                | hp-3176-manC-O41                 | O41                     | hp-3262-wzy_O38        | O38                |
| hp-3051-FL-k+z       | a; z10                                                          | hp-3177-manC-O41                 | O41                     | hp-3263-wzy_O41+62     | O41; O62           |
| hp-3052-FL-z         | z41                                                             | hp-3178-manC-O41                 | O41                     | hp-3264-wzy_O41+62     | O41; O62           |
| hp-3053-FL-k+z       | z81                                                             | hp-3179-manC-O13+O30+O43+O45+O50 | O13; O30; O43; O45; O50 | hp-3265-wzy_O50        | O50                |
| hp-3054-FL-k+z       | z35                                                             | hp-3180-manC-O13+O30+O43+O45+O50 | O13; O30; O43; O45; O50 | hp-3266-wzy_O50        | O50                |
| hp-3055-FL-k+z       | z35                                                             | hp-3181-manC-O13+O30+O43+O45+O50 | O13; O30; O43; O45; O50 | hp-3267-wzy_O55        | O55                |
| hp-3056-FL-k+z       | z35                                                             | hp-3182-manC-O13+O30+O43+O45+O50 | O13; O30; O43; O45; O50 | hp-3268-wzy_O55        | O55                |
| hp-3057-FL-k+z       | (k)                                                             | hp-3183-manC-O13+O30+O43+O45+O50 | O13; O30; O43; O45; O50 | hp-3269-wzy_O56        | O56                |
| hp-3058-FL-k+z       | z10                                                             | hp-3184-manC-O13+O30+O43+O45+O50 | O13; O30; O43; O45; O50 | hp-3270-wzy_O56        | O56                |
| hp-3060-FL-k+z       | k; z41                                                          | hp-3185-manC-O13+O30+O43+O45+O50 | O13; O30; O43; O45; O50 | hp-3271-wzy_O58        | O58                |
| hp-3061-FL-k+z       | (k)                                                             | hp-3186-manC-O13+O30+O43+O45+O50 | O13; O30; O43; O45; O50 | hp-3272-wzy_O58        | O58                |
| hp-3062-FL-l+z39+z52 | z39                                                             | hp-3187-manC-O13+O30+O43+O45+O50 | O13; O30; O43; O45; O50 | hp-3273-wzy_O6,14      | O6,14              |
| hp-3063-FL-l+z39+z52 | l,v; l,z13; l,z28; l,z13,z28; l,w                               | hp-3188-manC-O2+4+9+3,10         | O2; O4; O9; O3,10       | hp-3274-wzy_O6,14      | O6,14              |
| hp-3065-FL-l+z39+z52 | z52                                                             | hp-3189-manC-O2+4+9+3,10         | O2; O4; O9; O3,10       | hp-3275-wzy_O7         | O7                 |
| hp-3066-FL-l+z39+z52 | l,v; l,z13; l,z28; l,w; l,z13,z28                               | hp-3190-manC-O40                 | O40                     | hp-3276-wzy_O7         | O7                 |
| hp-3067-FL-y         | y                                                               | hp-3191-manC-O40                 | O40                     | hp-3277-wzy_O8         | O8                 |
| hp-3068-FL-y         | y                                                               | hp-3192-rfbV-O2+9+9,46           | O2; O9; O9,46           | hp-3278-wzy_O8         | O8                 |
| hp-3069-FL-z29       | z29                                                             | hp-3193-rfbV-O2+9+9,46           | O2; O9; O9,46           | hp-3279-wzy_O18        | O18                |
| hp-3070-FL-z29       | z29                                                             | hp-3194-rfbV-O4                  | O4                      | hp-3280-SSPAI          | Paratyphi A        |
| hp-3071-FL-z36+z38   | z38                                                             | hp-3195-rfbV-O4                  | O4                      | hp-3281-SSPAI          | Paratyphi A        |
| hp-3072-FL-z36+z38   | z36; z36,z38                                                    | hp-3196-wbuH-O41+62              | O41; O62                | hp-3282-Q8ZK10         | Typhimurum         |
| hp-3073-FL-z36+z38   | z36; z36,z38                                                    | hp-3197-wbuH-O41+62              | O41; O62                | hp-3287-lygA           | Enteritidis        |
| hp-3074-FL-z36+z38   | z36; z36,z38                                                    | hp-3198-weiB_O66                 | O66                     | hp-3288-lygD           | Enteritidis        |
| hp-3075-FL-z36+z38   | z36,z38; z38                                                    | hp-3199-weiB_O66                 | O66                     | hp-3289-Q8ZK15         | Typhimurium        |
| hp-3076-FL-z4        | z4,z23; z4,z23,z32; z4,z24; z4,z32                              | hp-3200-wzx_O13                  | O13                     | hp-3290-tviA           | plasmid Vi         |
| hp-3077-FL-z4        | z4,z24                                                          | hp-3201-wzx_O13                  | O13                     | hp-3292-tviA           | plasmid Vi         |
| hp-3078-FL-z4        | z4,z23,z32                                                      | hp-3202-wzx_O16                  | O16                     | hp-3293-stgA           | Typhi              |
| hp-3080-FL-z65       | z65                                                             | hp-3203-wzx_O16                  | O16                     | hp-3294-stgA           | Typhi              |
| hp-3085-FL-g         | f,g; f,g,s,t; f,g,t; g,m,p,q; g,m,t; g,z62                      | hp-3204-wzx_O17                  | O17                     | hp-3297-sefB           | Enteritidis        |
| hp-3086-FL-g         | f,g; f,g,s,t; f,g,t; g,m,p,q; g,m,s; g,m,s,t; g,m,t; g,t; g,z62 | hp-3205-wzx_O17                  | O17                     | hp-3298-sefA           | Enteritidis        |

**Table 2.** Cont.

| Probe                 | Potential Function                                                      | Probe                  | Potential Function | Probe          | Potential function      |
|-----------------------|-------------------------------------------------------------------------|------------------------|--------------------|----------------|-------------------------|
| hp-3087-FL-g          | f,g; f,g,s,t; f,g,t; g,m,p,q; g,m,t; g,t; g,z62                         | hp-3206-wzx_O18        | O18                | hp-3299-sefC   | Enteritidis             |
| hp-3089-FL-g          | f,g,t; g,m,t; m,t                                                       | hp-3207-wzx_O18        | O18                | hp-3300-galF   | species marker          |
| hp-3090-FL-g          | f,g,t; g,m,t; m,t                                                       | hp-3208-wzx_O2+9       | O2; O9             | hp-3301-B5FQV7 | Dublin                  |
| hp-3091-FL-g          | f,g; f,g,s,t; f,g,t; g,m,p,q; g,m,s; g,m,s,t; g,m,t; g,t; g,z62         | hp-3209-wzx_O2+9       | O2; O9             | hp-3302-B5R5L5 |                         |
| hp-3092-FL-g          | f,g; f,g,s,t; g,m,p,q; g,m,s; g,m,s,t; g,m,t; g,t; g,z62                | hp-3210-wzx_O28_Dakar  | O28 serovar Dakar  | hp-3306-B5R7B6 | Gallinarum, Weltevreden |
| hp-3103-FL-g          | f,g; f,g,s,t; f,g,t; g,m,p,q; g,m,s; g,m,s,t; g,m,t; g,t; g,z62         | hp-3211-wzx_O28_Dakar  | O28 serovar Dakar  | hp-3307-B5R7C1 |                         |
| hp-3104-FL-g          | f,g; f,g,s,t; f,g,t; g,m,p,q; g,m,s; g,m,t; g,tg,z51                    | hp-3212-wzx_O28_Pomona | O28 serovar Pomona | hp-3308-ISR1   | Infantis                |
| hp-3105-FL-g          | f,g; f,g,s,t; f,g,t; g,m,p,q; g,m,s; g,m,s,t; g,m,t; g,t; g,z51; g,z62; | hp-3213-wzx_O28_Pomona | O28 serovar Pomona | hp-3310-ISR1   | Infantis                |
| hp-3106-FL-g          | f,g; f,g,s,t; f,g,t; g,m,p,q; g,m,s; g,m,s,t; g,m,t; g,t; g,z51; g,z62; | hp-3214-wzx_O3,10      | O3,10              | hp-3311-Q57QY4 | Choleraesuis            |
| hp-3107-FL-g          | m,t                                                                     | hp-3215-wzx_O3,10      | O3,10              | hp-3312-Q57QY4 | Choleraesuis            |
| hp-3108-FL-g          | m,t                                                                     | hp-3216-wzx_O30        | O30                | hp-3314-invA   | species marker          |
| hp-3109-FL-g          | m,t                                                                     | hp-3217-wzx_O30        | O30                | hp-3315-invA   | species marker          |
| hp-3113-FL-l+ z39+z52 | z39                                                                     | hp-3218-wzx_O35        | O35                | hp-3316-invA   | species marker          |

doi:10.1371/journal.pone.0046489.t002

if *Salmonella* isolates were tested (Table 1). Further, two probes for the Vi capsular antigen (Table 2) were included and were partly positive for *S. ser. Paratyphi C* and always positive for *S. ser. Typhi*. All tested *S. ser. Dublin* strains were negative for the Vi capsular antigen.

Probes and primers for AMR genotyping of *Salmonella* serovars were derived from a genotyping microarray for *E. coli* that was previously developed, validated and described ([25], [http://alere-technologies.com/fileadmin/Media/Paper/Ecoli/Supplement\\_Geue\\_\\_layout\\_E\\_coli.xlsx](http://alere-technologies.com/fileadmin/Media/Paper/Ecoli/Supplement_Geue__layout_E_coli.xlsx)).

77 probes were selected out of this panel because these genes, or variants thereof with a maximum of 2 mismatches, have previously been found in *Salmonella* serovars. The selected probes were used to detect the following antimicrobial resistance genes (Table 3): *aac3Ia*, *aac3Ie*, *aac6Ib*, *aac6II*, *aadA1*, *aadA2*, *aadA23b*, *aadA3*, *aadA5*, *aadB*, *ant2Ia*, *aphA*, *armA*, *sph*, *strA*, *strB* (resistance to various aminoglycosides); *catA1*, *catB3*, *catB8*, *cmlA*, *floR* (chloramphenicol); *tetA*, *tetB*, *tetC*, *tetD*, *tetG* (tetracyclines); *sul1*, *sul2*, *sul3*, *dfrA1*, *dfrA5*, *dfrA7*, *dfrA12*, *dfrA13*, *dfrA14*, *dfrA15*, *dfrA17*, *dfrA19* (sulfonamide/trimethoprim); *ble* (glycopeptides: bleomycin); *qnrA*, *qnrB*, *qnrD*, *qnrS* (quinolones); *acc1*, *carB2*, *cmy2*, *ctxM1*, *ctxM2*, *ctxM26*, *ctxM9*, *dha1*, *oxa1*, *oxa2*, *oxa10*, *oxa53*, *per2*, *shv*, *tem1* (beta-lactam compounds); *kpc4* (carbapenems) and *ereA*, *mphA* (macrolides). Additionally, two probes were designed to determine the presence of genes *intI1* and *intI2* possibly mediating an integrase function [26,27].

All 332 probes (255 serotyping and 77 AMR probes, synthesized by Metabion, Martinsried, Germany) were spotted at Alere Technologies, Germany in duplicates to the ArrayStrips as previously described [28]. Biotinylated oligonucleotides with a random sequence were spotted as a staining control and spotting buffer was spotted as a negative control.

### Multiplex linear DNA amplification and labeling for hybridization to prepared ArrayStrips

For multiplex linear DNA amplification, a set of 292 primers (220 serotyping primer and 72 AMR primer, synthesized by Metabion, Martinsried, Germany) was used. These primers are located on the complementary strand, downstream of the sequence of the covalently immobilized oligonucleotide detection probes (the number of probes and primers do not need to be identical, a primer can target a consensus region, while probes might bind to more variable parts close by, which allows discerning different alleles of one gene). The labeling of the genomic DNA was accomplished during the linear amplification step by using dUTP linked biotin as a marker, thereby allowing site-specific internal labeling of the corresponding target region (Fig. 1a). Using the HybPlus Kit (Alere Technologies, Germany), at least 0.5 µg genomic DNA were labeled according to the manufacturer's instructions. The linear amplification steps included 5 min of initial denaturation at 96°C, followed by 50 cycles with 20 s of annealing at 50°C, 40 s of elongation at 72°C, and 60 s of denaturation at 96°C. This reaction results in a multitude of specifically amplified, single-stranded, biotin-labeled DNA molecules for subsequent hybridization to the corresponding DNA microarray.

### Hybridization of the ArrayStrips

For the hybridization procedures, the HybPlus Kit (Alere Technologies, Germany) was used according to the manufacturer's instructions with an adapted protocol. This included hybridization buffer C1, washing buffer C2, peroxidase-streptavidin conjugate C3, conjugation buffer C4, washing buffer C5 and peroxidase substrate D1.

**Table 3.** Summary of probes detecting antibiotic resistance genes and virulence factors.

| Probe          | Potential Function        | Probe          | Potential function                         |
|----------------|---------------------------|----------------|--------------------------------------------|
| hp_armA_611    | aminoglycoside resistance | hp_ble_611     | bleomycin resistance                       |
| prob_aac3la_1  | aminoglycoside resistance | prob_catA1_11  | chloramphenicol resistance                 |
| hp_aac3_611    | aminoglycoside resistance | prob_catB3_11  | chloramphenicol resistance                 |
| prob_aac6lb_1  | aminoglycoside resistance | prob_catB8_12  | chloramphenicol resistance                 |
| prob_aadA1_1   | aminoglycoside resistance | prob_cmlA1_11  | chloramphenicol resistance                 |
| prob_aadA2_1   | aminoglycoside resistance | prob_floR_11   | florfenicol and chloramphenicol resistance |
| prob_aadA4_1   | aminoglycoside resistance | hp_mphA_611    | erythromycin and roxythromycin resistance  |
| prob_ant2la_1  | aminoglycoside resistance | hp_ereA_611    | erythromycin resistance                    |
| hp_aac6_612    | aminoglycoside resistance | prob_qnrB_12   | fluoroquinolone resistance                 |
| hp_aac6_615    | aminoglycoside resistance | hp_kpc4_611    | imipenem resistance                        |
| hp_aac6_618    | aminoglycoside resistance | hp_qnrD_611    | quinolone resistance                       |
| hp_aadB_611    | aminoglycoside resistance | prob_qnr_12    | quinolone resistance                       |
| hp_aadB-2_611  | aminoglycoside resistance | prob_qnr5_11   | quinolone resistance                       |
| hp_sph_611     | aminoglycoside resistance | prob_sul1_11   | sulfonamide resistance                     |
| prob_strA_611  | aminoglycoside resistance | prob_sul2_11   | sulfonamide resistance                     |
| prob_strB_611  | aminoglycoside resistance | prob_sul3_11   | sulfonamide resistance                     |
| hp_aac3_614    | aminoglycoside resistance | prob_tetA_11   | tetracycline resistance                    |
| hp_aphA_611    | aminoglycoside resistance | prob_tetB_11   | tetracycline resistance                    |
| hp_blaCMY_611  | beta-lactam resistance    | prob_tetC_11   | tetracycline resistance                    |
| hp_per2_611    | beta-lactam resistance    | prob_tetD_1    | tetracycline resistance                    |
| prob_acc1_11   | beta-lactam resistance    | prob_tetG_11   | tetracycline resistance                    |
| prob_acc2_11   | beta-lactam resistance    | prob_dfr12_11  | trimethoprim resistance                    |
| prob_cmy_11    | beta-lactam resistance    | prob_dfr13_11  | trimethoprim resistance                    |
| prob_ctxM1_11  | beta-lactam resistance    | prob_dfrA1_21  | trimethoprim resistance                    |
| prob_ctxM2_11  | beta-lactam resistance    | prob_dfrA1_22  | trimethoprim resistance                    |
| prob_ctxM26_11 | beta-lactam resistance    | prob_dfrA14_21 | trimethoprim resistance                    |
| prob_ctxM9_11  | beta-lactam resistance    | prob_dfrA15_1  | trimethoprim resistance                    |
| prob_dha1_1    | beta-lactam resistance    | prob_dfrA17_11 | trimethoprim resistance                    |
| prob_oxa1_21   | beta-lactam resistance    | prob_dfrA19_1  | trimethoprim resistance                    |
| prob_oxa2_11   | beta-lactam resistance    | prob_dfrA7_11  | trimethoprim resistance                    |
| prob_oxa7_11   | beta-lactam resistance    | prob_dfrA7_12  | trimethoprim resistance                    |
| prob_per2_1    | beta-lactam resistance    | prob_dfrV_21   | trimethoprim resistance                    |
| prob_pse1_1pm  | beta-lactam resistance    | prob_int1_1    | integrase                                  |
| prob_shv1_11   | beta-lactam resistance    | prob_int2_11   | integrase                                  |
| prob_tem1_1    | beta-lactam resistance    |                |                                            |

doi:10.1371/journal.pone.0046489.t003

First, ArrayStrips were placed in a thermomixer (Quantifoil Instruments, Jena, Germany) and subsequently washed with 200 µl of de-ionized water for 5 min at 55°C/550 rpm and with 100 µl hybridization buffer C1 for 5 min at 55°C/550 rpm. All liquids were always completely removed with a soft plastic pipette to avoid scratching of the chip surface. In a separate tube, 10 µl of the labeled, single-stranded DNA were dissolved in 90 µl hybridization buffer C1. The hybridization was carried out at 55°C, shaking at 550 rpm for 1 h. After hybridization, the ArrayStrips were washed two times for 5 min with 200 µl washing buffer C2 at 45°C, shaking at 550 rpm. Peroxidase-streptavidin conjugate C3 was diluted 1:100 in buffer C4. A total of 100 µl of this mixture were added to each slot of the ArrayStrip, and

subsequently incubated for 10 min at 30°C and 550 rpm. Afterwards, washing was carried out two times at 550 rpm with 200 µl C5 washing buffer at 30°C, with each step performed for 5 min. The visualization was achieved by adding 100 µl of peroxidase substrate D1 to the ArrayStrips, and signals were detected with the ArrayMate device (Alere Technologies, Jena, Germany) (Fig. 1b–c).

The described, final protocol was achieved by optimizing hybridization conditions (45°C–58°C) and washing temperatures (45°C–58°C) whereas the concentration of substances and incubation periods for each step were always constant. For this procedure, only strains were used for which published genome sequences (NCBI genome database) allowed to theoretically

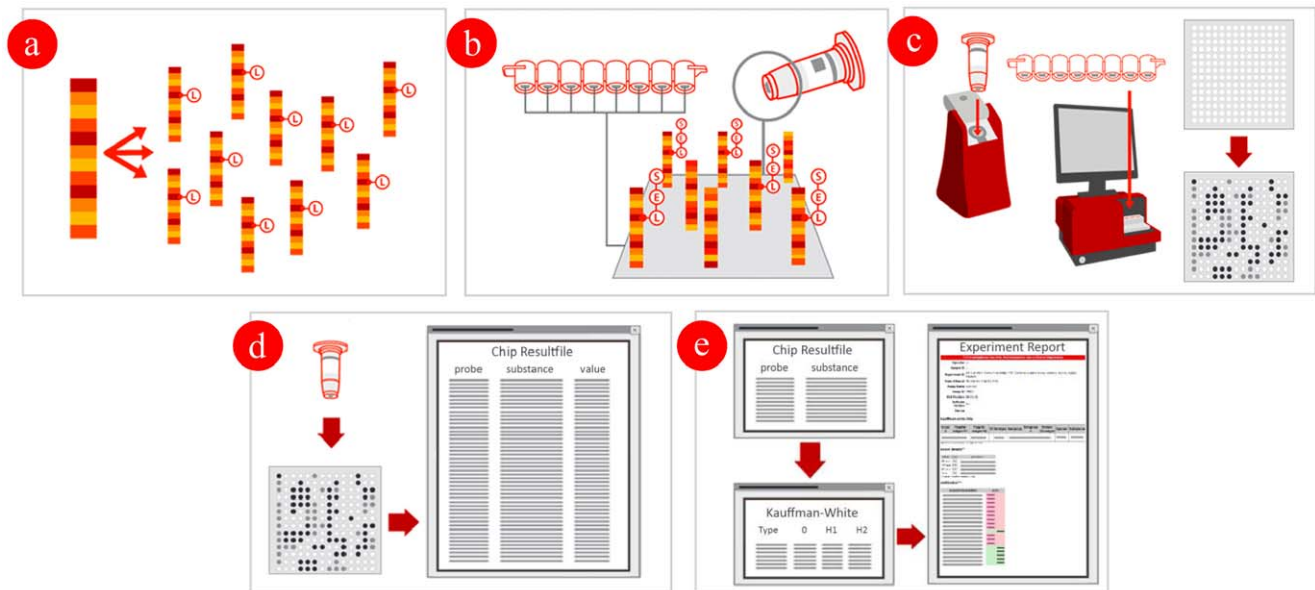

**Figure 1. Multiplex linear DNA amplification, labeling and hybridization of the ArrayStrips.** (a) Linear Multiplex Amplification starting from clonal RNA free genomic DNA, extracted DNA is internally labeled with biotin (Label [L]) and amplified in a linear multiplex PCR reaction; (b) Hybridization: the biotin labeled, single-stranded DNA product hybridizes specifically under stringent conditions to the corresponding probes. The resulting duplex is detected using a horse-radish peroxidase (Enzyme [E]) – streptavidin conjugate, which converts the substrate (Seramun green [S]) into a colored local precipitate. (c) Detection: the ArrayMate™ Reader (or ArrayTube™ Reader ATR 03) enables the visualization and subsequent automated analysis of the array image. The presence of a dark precipitated spot indicates successful hybridization; (d) Analysis: the assay specific software analysis script, supplied with the ArrayMate™ Reader (or ArrayTube™ Reader ATR 03), measures the signal intensity of each probe and determines with an assay specific algorithm which genes/alleles are present in the sample. (e) Genotype analysis: the PatternMatching software supplied with the ArrayMate™ Reader (or ArrayTube™ Reader ATR 03) is comparing the resulting pattern with a local database including 132 reference serovars previously sero- and genotyped, finally a report is given to which serovar the sample strain belongs with regard to the Kauffman-White Scheme.

doi:10.1371/journal.pone.0046489.g001

predict hybridization patterns (see Result part). These were strains *S. ser. Agona* (SL483), *S. ser. Choleraesuis* (SGSA50, SC-B67), *S. ser. Dublin* (SD3246, CT02021853), *S. ser. Enteritidis* (P125109), *S. ser. Gallinarum* (287/91, SG9), *S. ser. Heidelberg* (SL476), *S. ser. Infantis* (SIN), *S. ser. Newport* (SL254), *S. ser. Paratyphi A* (AKU\_12601, ATCC9150), *S. ser. Paratyphi B* (SPB7), *S. ser. Paratyphi C* (RKS4594), *S. ser. Schwarzengrund* (CVM19633), *S. ser. Typhi* (CT18, Ty2), *S. ser. Typhimurium* (14028S, 27120, D23580, SL1344, T000240, UK-1, LT2) and *S. ser. Weltevreden* (2007-60-3289-1). These predictions were subsequently compared with the results of real hybridization experiments. The absence and presence of signals at different hybridization temperatures were monitored and the final protocol as described above based on the experiments in which the best accordance between predictions and real hybridizations was observed.

### Processing data using PatternMatch algorithm

Hybridization signals were processed using the IconoClust software, version 3.2r1 (Fig. 1d). All spots were normalized automatically by the software according to the quotation  $NI = 1 - \left( \frac{M}{BG} \right)$  where NI is the normalized intensity, M the average intensity of the automatically recognized spot, and BG the intensity of the local background. The output range of the signals were between 0 and 1 with 0 being negative and 1 being the maximal possible signal value. A probe-matching matrix was used to construct the theoretical hybridization pattern of the fully sequenced strains listed in NCBI database (Table S1). The definition of the theoretical signal intensity was 0.9 for perfect

match, 0.6 for 1 mismatch, 0.3 for 2 mismatches, 0.1 and below for 3 mismatches and no signal for more mismatches. For each of these sequenced strains, at least one reference strain was used to assign the expected pattern with the pattern of the real hybridization experiments. For this operation, the PatternMatch algorithm was used [29]. The final numerical output was given as the matching score (MS), which represents the overall sum of all differences between corresponding signal intensities of theoretical and real hybridization experiments. Thus, the MS value is a measure of overall similarity/dissimilarity between two hybridization patterns. An ideal match of two patterns based on the same set of oligonucleotide probes will yield  $MS = 0$ , whereas values above  $MS = 6.5$  require critical scrutiny because they may indicate a poor match. The Delta MS value, defined as the arithmetic difference between best and second best match, served as measure for the accuracy of species identification. A Delta MS higher than 1.5 was considered to be sufficient for an unambiguous distinction between two patterns.

Calculation of similarities was carried out by comparing signals for all 255 probes between theoretical predictions and real experiments. Signals with intensities higher than 0.3, were considered positive and set as “1”. Signals lower than 0.3, were regarded negative and set as “0”. The number of probe differences was summarized and the percentage was calculated. In order to assess the reproducibility, eight experiments were performed under identical conditions. All experiments were compared to each other using the PatternMatch algorithm and the mean, maximum and minimum MS were calculated.

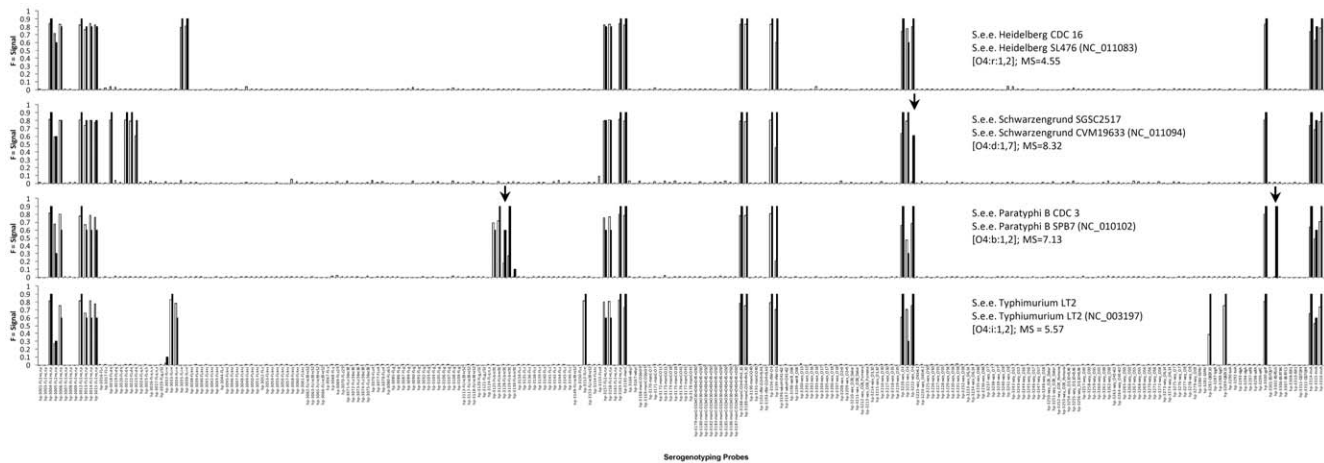

**Figure 2. Comparison for four different *Salmonella* serovars between theoretical predictions (white) and real hybridizations (black).** Arrows indicate the probes where differences were observed. For strain *S. ser. Typhimurium* LT2, the antigenic formula, the complete genome sequence (NC\_003197.1), and a prediction for its hybridization pattern based on this sequence were available. The threshold matching score (MS) of 6.5 between two real hybridization experiments do not apply for this comparison, as theoretical predictions do not represent real results. doi:10.1371/journal.pone.0046489.g002

### Antimicrobial resistance

All isolates in which AMR genes were detected, a total of 34 *Salmonella* isolates belonging to 18 serovars, were tested for their phenotypic antimicrobial resistance. This was carried out using the VITEK 2 system with the AST-N111 test panel (bioMérieux Deutschland GmbH, Nürtingen, Germany). Additionally, chloramphenicol (30 µg), kanamycin (30 µg) and streptomycin (10 µg) were tested by disk diffusion assay. This assay was performed using CLSI.

### Field study

A panel of 105 *Salmonella* isolates was tested in a blinded field study. All isolates were serotyped using the standard procedures [12] at the National Reference Laboratory for Salmonellosis in Cattle at the Friedrich-Loeffler-Institute (Jena, Germany). The serotyped isolates were subsequently genotyped using the automated PatternMatch software installed on the ArrayMate device (IconoClust version 3.2r1). Finally, serotyping and genotyping results were compared. Within this blinded panel, mistakes were defined as “major”, if a serovar was completely falsely identified (e.g., a Dublin isolate as Naestved). A “minor” mistake was if the serovar was identified correctly, but if a variant of this serovar was not recognized (e.g., *S. ser. Typhimurium* var. Copenhagen as *S. ser. Typhimurium*). Per definition, only “major” mistakes were regarded as incorrect hits.

## Results

### Verification of the assay and database building for PatternMatch

A set of 168 *Salmonella* strains representing 132 different serovars were used to evaluate the probes printed on the array, the primers in the labeling mixture, and to build a database for identification of the globally most prominent *Salmonella* serovars. Comparison of predicted and real hybridization results was performed for strains with fully sequenced genomes (see Materials and Methods and Table 4). The similarity between the predicted and real hybridization results of the serogenotyping array was more than 99 percent (Table 4). Because both, the full sequence information of the genome and the antigenic formula of *S. ser. Typhimurium*

strain LT2, were available, an exact comparison of predicted and actual experimental hybridization pattern was possible (Fig. 2). It showed a 100% identity when regarding just positive and negative signals. A more detailed analysis, also considering signal intensities, showed a high degree of similarity between theoretical predictions and actual experiments with exceptions at probe hp-3221-wzx\_O4 (signal intensity increased about 42% as predicted by the theoretical experiment) and hp-3282-Q8ZK10 (signal intensity decreased about 43% as predicted by the theoretical experiment). The highest discrepancy was found for *S. ser. Paratyphi* A and *S. ser. Paratyphi* B. Analysis of the results of *S. ser. Paratyphi* B showed that two probes were negative in actual hybridizations compared to the theoretical predictions (Fig. 2). However, the missing probes were redundant for one target gene (e.g., *S. ser. Paratyphi* B *fliC*-H1:b), so that this issue did not influence the identification. Because of the high correlation between theoretical predictions and actual experiments, as well as the high similarity of  $T_m$  of all 255 serotyping probes, it is assumed that the detection efficiency with other *Salmonella* serovars will also be comparably precise under the same conditions. Furthermore, the results of these theoretical experiments were used to find an optimal protocol (data not shown) for the hybridization of the *Salmonella* array so that an optimal, stringent hybridization and washing temperature could be defined (see Methods part).

Using this optimized protocol (as described in Materials and Methods), strains of all 132 *Salmonella* serovars were analyzed. Each serovar was tested at least three times using the *Salmonella* array to ensure consistent results and the identification of the unique and reproducible serovar-specific probe patterns. These unique patterns were used to build a PatternMatch database consisting of data from real experiments instead of theoretical experiments from defined strains. A manual serotyping using the probe-function table (Table 2) was restricted by the resolution of probes identify the H2-phase. This phase was mainly a combination of different probes, e.g. H2:1,5 of different serovars was always a combination of different “FL-1+e,n,x” probes (Table 2). Nevertheless it was possible to estimate the *Salmonella* serotype at least for the serogroup and in most cases for the phase H1. In the end the probe-function table served as a control for classical serotyped *Salmonella* before they were used in the PatternMatch database.

**Table 4.** Comparison of theoretical predictions and real hybridization patterns for the *Salmonella* array and previously typed strains (CDC, DSMZ).

| Virtual Hybridization |                |                           |             | Real Hybridization    |                                       |                |                    | Comparison                  |                                                                                 |                 |
|-----------------------|----------------|---------------------------|-------------|-----------------------|---------------------------------------|----------------|--------------------|-----------------------------|---------------------------------------------------------------------------------|-----------------|
| Serovar               | Strain         | Accession No.             | Serogroup   | Antigenic Formula     | Correct Antigenic Formula Designation | Serovar        | Reference Strain   | Correct Serovar Designation | Number of Probe Differences between Virtual and Real Hybridization <sup>a</sup> | Similarity in % |
| Agona                 | SL483          | NC_011149.1               | B (O:4)     | 1,4,[5],12:f,g:s[1,2] | YES                                   | Agona          | CDC1636            | YES                         | 0/255                                                                           | 100.0           |
| Choleraesuis          | SGSA50         | CM001062.1                | C1 (O:7)    | 6,7:c:1,5             | YES                                   | Choleraesuis   | DSM 14846          | YES                         | 0/255                                                                           | 100.0           |
| Choleraesuis          | SC-B67         | NC_006905                 | C1 (O:7)    | 6,7:c:1,5             | YES                                   | Choleraesuis   | DSM14846           | YES                         | 0/255                                                                           | 100.0           |
| Dublin                | SD3246         | CM001151.1                | D1 (O:9)    | 1,9,12[V]:g,p-        | YES                                   | Dublin         | CDC10-0635         | YES                         | 1/255                                                                           | 99.6            |
| Dublin                | CT02021853     | NC_011295.1               | D1 (O:9)    | 1,9,12[V]:g,p-        | YES                                   | Dublin         | CDC10-0636         | YES                         | 1/255                                                                           | 99.6            |
| Enteritidis           | P125109        | NC_011294.1               | D1 (O:9)    | 1,9,12:g,m:-          | YES                                   | Enteritidis    | DSM17420           | YES                         | 0/255                                                                           | 100.0           |
| Gallinarum            | 287/91         | NC_011274.1               | D1 (O:9)    | 1,9,12:-:-            | YES                                   | Gallinarum     | CDC74              | YES                         | 1/255                                                                           | 99.6            |
| Gallinarum            | SG9            | CM001153.1                | D1 (O:9)    | 1,9,12:-:-            | YES                                   | Gallinarum     | CDC74              | YES                         | 1/255                                                                           | 99.6            |
| Heidelberg            | SL476          | NC_011083.1               | B (O:4)     | 1,4,[5],12:r:1,2      | YES                                   | Heidelberg     | CDC16              | YES                         | 0/255                                                                           | 100.0           |
| Infantis              | SIN            | sanger.ac.uk <sup>b</sup> | C1 (O:7)    | 6,7,14:r:1,5          | YES                                   | Infantis       | CDC1428            | YES                         | 0/255                                                                           | 100.0           |
| Newport               | SL254          | NC_011080.1               | C2-C3 (O:8) | 6,8,20:e,h:1,2        | YES                                   | Newport        | CDC 2434           | YES                         | 0/255                                                                           | 100.0           |
| Paratyphi A           | AKU_12601      | NC_011147.1               | A (O:2)     | 1,2,12:a:[1,5]        | YES                                   | Paratyphi A    | CDC1               | YES                         | 2/255                                                                           | 99.2            |
| Paratyphi A           | ATC C9150      | NC_006511.1               | A (O:2)     | 1,2,12:a:[1,5]        | YES                                   | Paratyphi A    | CDC1               | YES                         | 2/255                                                                           | 99.2            |
| Paratyphi B           | SPB7           | NC_010102.1               | B (O:4)     | 1,4,[5],12:b:1,2      | YES                                   | Paratyphi B    | CDC3               | YES                         | 2/255                                                                           | 99.2            |
| Paratyphi C           | RKS4594        | NC_012125.1               | C1 (O:7)    | 6,7,[V]:c:1,5         | YES                                   | Paratyphi C    | CDC33              | YES                         | 0/255                                                                           | 100.0           |
| Schwarzengrund        | CVM19633       | NC_011094.1               | B (O:4)     | 1,4,12,27,d:1,7       | YES                                   | Schwarzengrund | CDC1629            | YES                         | 1/255                                                                           | 99.6            |
| Typhi                 | CT18           | NC_003198.1               | D1 (O:9)    | 9,12[V]:d:-           | YES                                   | Typhi          | No. 1 <sup>c</sup> | YES                         | 0/255                                                                           | 100.0           |
| Typhi                 | Ty2            | NC_004631.1               | D1 (O:9)    | 9,12[V]:d:-           | YES                                   | Typhi          | No. 1 <sup>c</sup> | YES                         | 0/255                                                                           | 100.0           |
| Typhimurium           | 140285         | NC_016856.1               | B (O:4)     | 1,4,[5],12:i:1,2      | YES                                   | Typhimurium    | CDC14              | YES                         | 0/255                                                                           | 100.0           |
| Typhimurium           | 27120          | NC_016857.1               | B (O:4)     | 1,4,[5],12:i:1,2      | YES                                   | Typhimurium    | CDC14              | YES                         | 0/255                                                                           | 100.0           |
| Typhimurium           | D23580         | FN424405.1                | B (O:4)     | 1,4,[5],12:i:1,2      | YES                                   | Typhimurium    | CDC14              | YES                         | 0/255                                                                           | 100.0           |
| Typhimurium           | LT2            | NC_003197.1               | B (O:4)     | 1,4,[5],12:i:1,2      | YES                                   | Typhimurium    | LT2                | YES                         | 0/255                                                                           | 100.0           |
| Typhimurium           | SL1344         | NC_016810.1               | B (O:4)     | 1,4,[5],12:i:1,2      | YES                                   | Typhimurium    | CDC14              | YES                         | 0/255                                                                           | 100.0           |
| Typhimurium           | T000240        | NC_016860.1               | B (O:4)     | 1,4,[5],12:i:1,2      | YES                                   | Typhimurium    | CDC14              | YES                         | 0/255                                                                           | 100.0           |
| Typhimurium           | UK-1           | NC_016863.1               | B (O:4)     | 1,4,[5],12:i:1,2      | YES                                   | Typhimurium    | CDC14              | YES                         | 0/255                                                                           | 100.0           |
| Weltevreden           | 2007-60-3289-1 | FR775255.1                | E1 (O:3,10) | 3:(10)[15]:r,z6       | YES                                   | Weltevreden    | CDC147             | YES                         | 0/255                                                                           | 100.0           |

<sup>a</sup>maximal difference of serogenotyping probes at a signal threshold of 0.3.

<sup>b</sup>ftp://ftp.sanger.ac.uk/pub/pathogens/Salmonella/SG.dbs.

<sup>c</sup>only genomic DNA of *Salmonella* Typhi, courtesy of Rene S. Hendriksen, DTU Food, Denmark.

Calculation of similarities was carried out by comparing predictions to measured signals for all 255 probes. Signals with intensities higher than 0.3, were considered positive and set as "1". Signals lower than 0.3 were regarded negative and set as "0". The number of probes which differ was summarized and the percentage was calculated. doi:10.1371/journal.pone.0046489.t004



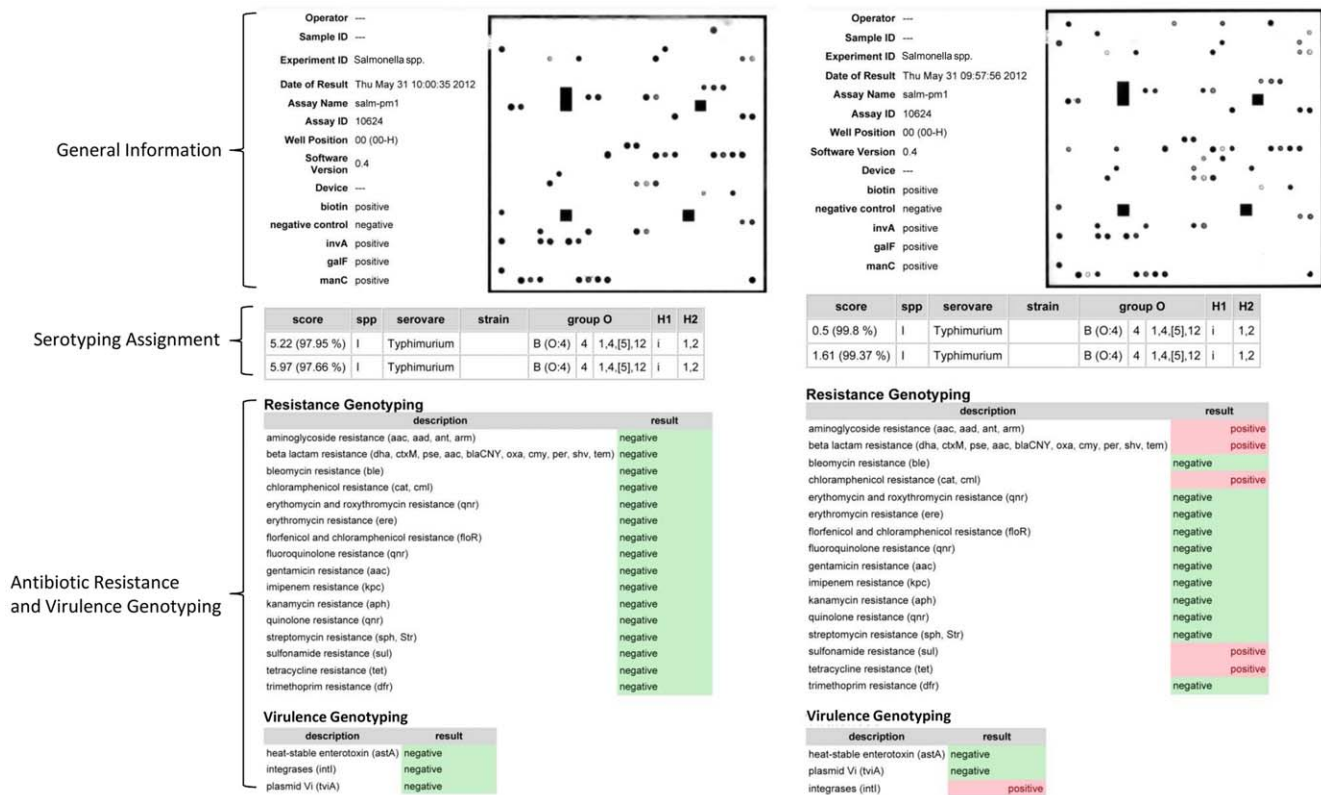

**Figure 3. Result sheets of the PatternMatch software as generated by the ArrayMate™ Reader.** General information: sample ID, negative/positive staining control and marker detecting genus *Salmonella* (*invA*, *galF*, *manC*). Serotyping assignment section: two best hits according to the processed sample were given as matching scores (MS) and as percentage. Antibiotic resistance and virulence genotyping section: detectable resistance and virulence genes. The pattern looks slightly different because of positive probes for resistance genes (*aadA1*, *aadA2*, *cmlA1*, *dfrA12*, *sul3*, *tem1*, *tetB*) that usually are located on mobile genetic elements. doi:10.1371/journal.pone.0046489.g003

**Detection software**

Using the described PatternMatch module, a software package was developed to analyze *Salmonella* serovars directly at the ArrayMate device directly after scanning and calculating signals of the stained arrays (IconoClust Software version 3.2r1) (Fig. 1e). The detection software used the same database comprising 168 reference *Salmonella* strains (representing 132 *Salmonella* serovars) which were classically serotyped. Patterns of unknown *Salmonella* were compared to the whole database and the two best hits were given in a result sheet (Fig. 3). Prior to PatternMatching, all calculated signals were normalized within a range of 0 and 1. Briefly, the mean of valid signals was calculated and subsequently, the formula  $S_n = \left( \frac{S_m - \min}{\max - \min} \right)$  ( $S_n$  = normalized signal,  $S_m$  = mean of signal,  $\min$  = Minimum of all signals,  $\max$  = maximum of all signals) was used to normalize the mean of valid values. Due to the normalization procedure, experiments with very low signal intensity could also be analyzed and subsequently compared with the database. This method guaranteed a correct assignment to the reference pattern within the provided database. Furthermore, different parameters were requested by the software: a) two biotin marker spots as positive staining controls, b) spotting buffer as a negative control and c) marker for detection of *Salmonella*. These results were included in the result sheet (Fig. 3). Additionally, the report contains the genotyping results of all AMR genes. The software tool was evaluated using all reference strains included in the database. All 168 reference strains were perfectly identified

even if the experiment showed weak signals (data not presented here). A multiple PatternMatch analysis of eight identical hybridization experiments with the same genomic DNA isolated from *S. ser. Typhimurium* DSM5569 showed a mean matching score (MS) of  $2.12 \pm 0.65$  with a maximum MS of 3.32 and a minimum MS of 1.15. The mean and maximum MS were significantly (t-test,  $p < 0.05$ ) lower than the MS value for poor matches ( $MS > 6.5$ ). These results showed the high reproducibility of this assay described in this study.

**Antibiotic resistance**

In a panel of 34 *Salmonella* strains 26 different AMR genes were detected and subsequently compared with the AMR phenotype of these strains (Table 5, detailed view in Table S2). A high correlation was observed for all detected genes relating to the AMR phenotype. An extended-spectrum beta-lactamase (ESBL) gene, *ctxM1*, was detected once, in an isolate of *S. ser. Anatum* AMR07. This strain was resistant against ceftazidime and cefpodoxime, both members of third generation beta lactams. AMR phenotypes for which no corresponding AMR genotype were detected included streptomycin resistance in two isolates (*S. ser. Saintpaul* and *S. ser. 1,4,[5],12:i:-*) and ampicillin resistance in one *S. ser. Bredeney* isolate. The latter isolate yielded a positive signal in a nitrocefin assay (BBL DrySlide Nitrocefin, Becton Dickinson). No assessment was possible for resistance genes *sul1* and *sul2* that should cause isolated resistance to sulfonamides because

**Table 5.** Comparison of antimicrobial resistance (AMR) genotype and AMR phenotype.

| AMR Genes                  | Genbank No.                        | AMR Family               | Antibiotics Tested to AMR Phenotype          | Gene detected | Resistance dedected | Sensitivity detected | Correlation (%) |
|----------------------------|------------------------------------|--------------------------|----------------------------------------------|---------------|---------------------|----------------------|-----------------|
| <i>aac6II</i>              | AV123251.1                         | Aminoglycoside           | Gentamicin, Tobramycin                       | 1             | 1                   | 0                    | 100             |
| <i>aadA1</i>               | AB126599.1                         | Aminoglycoside           | Streptomycin                                 | 14            | 14                  | 0                    | 100             |
| <i>aadA2</i>               | AB126602.1                         | Aminoglycoside           | Streptomycin                                 | 5             | 5                   | 0                    | 100             |
| <i>aphA1</i>               | AB366440.1                         | Aminoglycoside           | Kanamycin                                    | 5             | 5                   | 0                    | 100             |
| <i>sph</i>                 | AB366441.1                         | Aminoglycoside           | Streptomycin                                 | 1             | 1                   | 0                    | 100             |
| <i>strA</i>                | AB366440.1                         | Aminoglycoside           | Streptomycin                                 | 10            | 10                  | 0                    | 100             |
| <i>strB</i>                | AB366440.1                         | Aminoglycoside           | Streptomycin                                 | 14            | 14                  | 0                    | 100             |
| <i>catA1</i>               | AB366440.1                         | Chloramphenicol          | Chloramphenicol                              | 5             | 5                   | 0                    | 100             |
| <i>cmIA</i>                | AJ487033.2                         | Chloramphenicol          | Chloramphenicol                              | 4             | 4                   | 0                    | 100             |
| <i>flor</i>                | AF118107.1                         | Chloramphenicol          | Chloramphenicol                              | 2             | 2                   | 0                    | 100             |
| <i>sul1</i>                | AF261825.2                         | Sulfonamide/Trimethoprim | Co-trimoxazol (Sulfamethoxazol/Trimethoprim) | 8             | 1                   | 7                    | - <sup>a</sup>  |
| <i>sul2</i>                | AB366440.1                         | Sulfonamide/Trimethoprim | Co-trimoxazol (Sulfamethoxazol/Trimethoprim) | 3             | 2                   | 1                    | - <sup>a</sup>  |
| <i>sul1, sul2</i>          | AF261825.2, AB366440.1             | Sulfonamide/Trimethoprim | Co-trimoxazol (Sulfamethoxazol/Trimethoprim) | 1             | 0                   | 1                    | - <sup>a</sup>  |
| <i>sul1, dfra1</i>         | AF261825.2, AF203818.1             | Sulfonamide/Trimethoprim | Co-trimoxazol (Sulfamethoxazol/Trimethoprim) | 1             | 1                   | 0                    | 100             |
| <i>sul1, dfra1, dfra15</i> | AF261825.2, AF203818.1, AJ867237.1 | Sulfonamide/Trimethoprim | Co-trimoxazol (Sulfamethoxazol/Trimethoprim) | 1             | 1                   | 0                    | 100             |
| <i>sul1, dfra12</i>        | AF261825.2, AB366440.1             | Sulfonamide/Trimethoprim | Co-trimoxazol (Sulfamethoxazol/Trimethoprim) | 1             | 1                   | 0                    | 100             |
| <i>sul1, dfra13</i>        | AF261825.2, AM932669.1             | Sulfonamide/Trimethoprim | Co-trimoxazol (Sulfamethoxazol/Trimethoprim) | 1             | 1                   | 0                    | 100             |
| <i>sul1, dfv</i>           | AF261825.2, DQ133160.1             | Sulfonamide/Trimethoprim | Co-trimoxazol (Sulfamethoxazol/Trimethoprim) | 1             | 1                   | 0                    | 100             |
| <i>sul1, sul2, dfra1</i>   | AF261825.2, AB366440.1, AF203818.1 | Sulfonamide/Trimethoprim | Co-trimoxazol (Sulfamethoxazol/Trimethoprim) | 2             | 2                   | 0                    | 100             |
| <i>sul1, sul2, dfra12</i>  | AF261825.2, AB366440.1, AB366440.1 | Sulfonamide/Trimethoprim | Co-trimoxazol (Sulfamethoxazol/Trimethoprim) | 1             | 1                   | 0                    | 100             |
| <i>sul2, dfra14</i>        | AB366440.1, DO388123.1             | Sulfonamide/Trimethoprim | Co-trimoxazol (Sulfamethoxazol/Trimethoprim) | 1             | 1                   | 0                    | 100             |
| <i>sul3, dfra1</i>         | AY316203.1, AF203818.1             | Sulfonamide/Trimethoprim | Co-trimoxazol (Sulfamethoxazol/Trimethoprim) | 1             | 1                   | 0                    | 100             |
| <i>sul3, dfra12</i>        | AY316203.1, AB366440.1             | Sulfonamide/Trimethoprim | Co-trimoxazol (Sulfamethoxazol/Trimethoprim) | 3             | 3                   | 0                    | 100             |



**Table 5. Cont.**

| AMR Genes        | Genbank No. | AMR Family     | Antibiotics Tested to AMR Phenotype                                | Gene detected | Resistance detected | Sensitivity detected | Correlation (%)           |
|------------------|-------------|----------------|--------------------------------------------------------------------|---------------|---------------------|----------------------|---------------------------|
| <i>ctxM1</i>     | FJ654733.1  | Beta-Lactam    | Ampicillin, Piperacillin, Cefuroxime, Cefpodoxime,1<br>Ceftazidime |               | 1                   | 0                    | 100                       |
| <i>oxa1</i>      | AB218659.1  | Beta-Lactam    | Ampicillin, Piperacillin, Cefuroxime                               | 2             | 2                   | 0                    | 100                       |
| <i>tem1</i>      | AB366440.1  | Beta-Lactam    | Ampicillin, Piperacillin                                           | 15            | 15                  | 0                    | 100                       |
| <i>terA</i>      | AB366441.1  | Tetracycline   | Tetracycline                                                       | 10            | 10                  | 0                    | 100                       |
| <i>terB</i>      | AB366440.1  | Tetracycline   | Tetracycline                                                       | 13            | 13                  | 0                    | 100                       |
| <i>terG</i>      | AF261825.2  | Tetracycline   | Tetracycline                                                       | 1             | 1                   | 0                    | 100                       |
| <i>mphA</i>      | AY333434.1  | Macrolide      |                                                                    | 1             | -                   | -                    | <sup>a</sup> <sub>b</sub> |
| no gene detected |             | Aminoglycoside | Streptomycin                                                       | 0             | 2                   | 0                    | <sup>c</sup>              |
| no gene detected |             | Beta-Lactam    | Ampicillin                                                         | 0             | 1                   | 0                    | <sup>c</sup>              |

<sup>a</sup>only co-trimoxazol was tested, sulfamethoxazol was not available.

<sup>b</sup>potential resistance against erythromycin was not tested.

<sup>c</sup>AMR phenotype without AMR genotype was detected.

All AMR genes detected in 34 *Salmonella* strains listed and compared with the AMR phenotype. The phenotype was defined using a VITEK 2 system with an AST-N111 panel and a disk diffusion assay using Oxoid discs with chloramphenicol (30 mg), streptomycin (10 mg) and kanamycin (30 mg).  
doi:10.1371/journal.pone.0046489.t005

testing was performed only for co-trimoxazole only.). A gene *mphA* mediating erythromycin resistance was found in *S. ser. Anatum* strain AMR05 (Table S2), but erythromycin susceptibility was not tested using a panel for gram-negatives on the VITEK 2 system.

**Field study**

After assay verification, the *Salmonella* serogenotyping assay was used to identify a field panel of 105 *Salmonella* isolates (Table 6) sampled and serotyped by the National Reference Laboratory for Salmonellosis in Cattle at the Friedrich-Loeffler-Institute (FLI, Jena, Germany). All tested isolates were identified as *Salmonella* and, out of 105 isolates, 93 were typed correctly (88.6%, Table 6). The limitation of the actual assay was that certain strains yielded identical patterns on the current array thus prohibiting further differentiation (Table 6). Such limitations occurred for *S. ser. Enteritidis*, which actually cannot be discriminated from *S. ser. Nitra* and *S. ser. Blegdam*. Furthermore, the pattern of *S. ser. Dublin* was identical to *S. serovars Naestved, Moscow and Kiel*. A discrimination of *S. ser. Dublin* and *S. ser. Kiel* was impossible as probes representing the genes *SeD\_A1100, SeD\_A1101 and SeD\_A1102* were positive for both serovars. Similar limitations were also observed for *S. ser. Panama* (identical pattern as *S. ser. Koessen*), *S. ser. Indiana* (identical pattern as *S. ser. Kiambu*) and *S. ser. Senftenberg* (identical pattern as *S. ser. Westhampton*). A monophasic *S. ser. Typhimurium* isolate (1,4,[5],12:i:-) was identified correctly. *Salmonella ser. Typhimurium var. Copenhagen* (1,4,12:i:1,2) was assigned to *S. ser. Typhimurium* (1,4,[5],12:i:1,2) and a rough form of *S. ser. Infantis* was assigned to non-rough *S. ser. Infantis*. These limitations were evaluated as minor mistakes and subsequently regarded as correct hits.

**Discussion**

The microarray for *Salmonella* serogenotyping was validated against the gold standard and was evaluated as an economical, fast, accurate and easy-to-use diagnostic tool with a high potential for standardization and automated high throughput use. For identification of *Salmonella* using serogenotyping assays, several studies have already been published [13,19,20,21]. The results of these publications showed high correlation of genotypic and phenotypic characterizations for genus *Salmonella*. Similar studies serogenotyping *Escherichia coli* [6,30,31] or *Chlamydia* [29,32] also found a direct correlation of geno- and phenotype.

For *Salmonella*, at least four genes seem to be significant for specification of the genotype; *wzx* and *wzy* specify the O-serogroup, and the genes *fliC* and *fljB* specify the H antigens. To improve the correlation of geno-and phenotype, we analyzed fully sequenced *Salmonella* strains (Table 4) using theoretical hybridization with all probes on the microarray. The result was a similarity of over 99% between the phenotype represented by the antigenic formula and the genotype represented by the microarray based assay. Within the panel of theoretical reference experiments, strain *S. ser. Typhimurium LT2* was the only one which was both fully sequenced and classically serotyped. Therefore, it was possible to compare the genotype represented through the NCBI database entry (NC\_003197.1) with our theoretical experiments and subsequently with the real experiments using the same strain, *S. ser. Typhimurium LT2*. Theoretical and real experiments had a concordance of 100%. Even a deeper view of the signal-mismatch prediction from theoretical experiments resulted in a good correlation to the real experiment (Fig. 2). Only two probes showed signal strengths that differed from the results predicted by the theoretical experiment. Such discrepancies may occur due to secondary structure of the amplicon which decreases the binding

**Table 6.** Field study with a blind panel of 105 isolates using the *Salmonella* serogenotyping assay.

| Species              | Serovar              | Strain  | Results of classical Serotyping |                           | Results of microarray based Serotyping |                  |                                  |
|----------------------|----------------------|---------|---------------------------------|---------------------------|----------------------------------------|------------------|----------------------------------|
|                      |                      |         | Serogroup                       | Antigenic Formula         | Unique Pattern                         | Serovar          | Alternative Serovar <sup>a</sup> |
| <i>S.e. enterica</i> | 1,4,5,12:i-          | NRL688  | B (O:4)                         | 1,4,[5],12:i-             | yes                                    | 1,4,[5],12:i-    |                                  |
| <i>S.e. enterica</i> | 1,4,5,12:i-          | NRL749  | B (O:4)                         | 1,4,[5],12:i-             | yes                                    | 1,4,[5],12:i-    |                                  |
| <i>S.e. enterica</i> | 1,4,5,12:i-          | NRL813  | B (O:4)                         | 1,4,[5],12:i-             | yes                                    | 1,4,[5],12:i-    |                                  |
| <i>S.e. enterica</i> | 1,4,5,12:i-          | NRL982  | B (O:4)                         | 1,4,[5],12:i-             | yes                                    | 1,4,[5],12:i-    |                                  |
| <i>S.e. enterica</i> | 1,4,5,12:i-          | NRL1004 | B (O:4)                         | 1,4,[5],12:i-             | yes                                    | 1,4,[5],12:i-    |                                  |
| <i>S.e. enterica</i> | 1,4,5,12:i-          | NRL1019 | B (O:4)                         | 1,4,[5],12:i-             | yes                                    | 1,4,[5],12:i-    |                                  |
| <i>S.e. enterica</i> | Abony                | NRL794  | B (O:4)                         | 1,4,[5],12,[27]:b:e,n,x   | yes                                    | Abony            |                                  |
| <i>S.e. enterica</i> | Agona                | FLI415  | B (O:4)                         | 1,4,[5],12:f,g,s:[1,2]    | yes                                    | Agona            |                                  |
| <i>S.e. enterica</i> | Agona                | FLI417  | B (O:4)                         | 1,4,[5],12:f,g,s:[1,2]    | yes                                    | Agona            |                                  |
| <i>S.e. enterica</i> | Agona                | FLI1157 | B (O:4)                         | 1,4,[5],12:f,g,s:[1,2]    | yes                                    | Agona            |                                  |
| <i>S.e. enterica</i> | Agona                | FLI449  | B (O:4)                         | 1,4,[5],12:f,g,s:[1,2]    | yes                                    | Agona            |                                  |
| <i>S.e. enterica</i> | Agona                | FLI709  | B (O:4)                         | 1,4,[5],12:f,g,s:[1,2]    | yes                                    | Agona            |                                  |
| <i>S.e. enterica</i> | Agona                | FLI1027 | B (O:4)                         | 1,4,[5],12:f,g,s:[1,2]    | yes                                    | Agona            |                                  |
| <i>S.e. enterica</i> | Anatum               | NRL939  | E1 (O:3,10)                     | 3,[10]{15}{15,34}:e,h:1,6 | yes                                    | Anatum           |                                  |
| <i>S.e. enterica</i> | Anatum               | NRL946  | E1 (O:3,10)                     | 3,[10]{15}{15,34}:e,h:1,6 | yes                                    | Anatum           |                                  |
| <i>S.e. enterica</i> | Anatum               | FLI452  | E1 (O:3,10)                     | 3,[10]{15}{15,34}:e,h:1,6 | yes                                    | Anatum           |                                  |
| <i>S.e. enterica</i> | Anatum               | NRL1006 | E1 (O:3,10)                     | 3,[10]{15}{15,34}:e,h:1,6 | yes                                    | Anatum           |                                  |
| <i>S.e. enterica</i> | Bareilly             | FLI608  | C1 (O:7)                        | 6,7,14:y:1,5              | yes                                    | Bareilly         |                                  |
| <i>S.e. enterica</i> | Bovismorbificans     | FLI646  | C2–C3 (O:8)                     | 6,8,20:r,[i]:1,5          | yes                                    | Bovismorbificans |                                  |
| <i>S.e. enterica</i> | Bovismorbificans     | FLI525  | C2–C3 (O:8)                     | 6,8,20:r,[i]:1,5          | yes                                    | Bovismorbificans |                                  |
| <i>S.e. enterica</i> | Braenderup           | FLI544  | C1 (O:7)                        | 6, 7,14: e,h: e,n,z15     | yes                                    | Braenderup       |                                  |
| <i>S.e. enterica</i> | Brandenburg          | NRL796  | B (O:4)                         | 4,[5],12:l,v:e,n,z15      | yes                                    | Brandenburg      |                                  |
| <i>S.e. enterica</i> | Brandenburg          | NRL869  | B (O:4)                         | 4,[5],12:l,v:e,n,z15      | yes                                    | Brandenburg      |                                  |
| <i>S.e. enterica</i> | Brandenburg          | NRL892  | B (O:4)                         | 4,[5],12:l,v:e,n,z15      | yes                                    | Brandenburg      |                                  |
| <i>S.e. enterica</i> | Brandenburg          | FLI419  | B (O:4)                         | 4,[5],12:l,v:e,n,z15      | yes                                    | Brandenburg      |                                  |
| <i>S.e. enterica</i> | Cerro                | NRL721  | K (O:18)                        | 6,14,18:z4,z23:[1,5]      | yes                                    | Cerro            |                                  |
| <i>S.e. enterica</i> | Choleraesuis         | FLI826  | C1 (O:7)                        | 6,8:c:1,6                 | yes                                    | Choleraesuis     |                                  |
| <i>S.e. enterica</i> | Choleraesuis         | FLI987  | C1 (O:7)                        | 6,7:c:1,5                 | yes                                    | Choleraesuis     |                                  |
| <i>S.e. enterica</i> | Derby                | FLI605  | B (O:4)                         | 1,4,[5],12:f,g:[1,2]      | yes                                    | Derby            |                                  |
| <i>S.e. enterica</i> | Derby                | FLI624  | B (O:4)                         | 1,4,[5],12:f,g:[1,2]      | yes                                    | Derby            |                                  |
| <i>S.e. enterica</i> | Derby                | NRL723  | B (O:4)                         | 1,4,[5],12:f,g:[1,2]      | yes                                    | Derby            |                                  |
| <i>S.e. enterica</i> | Derby                | NRL776  | B (O:4)                         | 1,4,[5],12:f,g:[1,2]      | yes                                    | Derby            |                                  |
| <i>S.e. enterica</i> | Derby                | NRL960  | B (O:4)                         | 1,4,[5],12:f,g:[1,2]      | yes                                    | Derby            |                                  |
| <i>S.e. enterica</i> | Derby                | FLI529  | B (O:4)                         | 1,4,[5],12:f,g:[1,2]      | no                                     | Derby            |                                  |
| <i>S.e. enterica</i> | Derby                | FLI624  | B (O:4)                         | 1,4,[5],12:f,g:[1,2]      | yes                                    | Derby            |                                  |
| <i>S.e. enterica</i> | Derby                | FLI666  | B (O:4)                         | 1,4,[5],12:f,g:[1,2]      | yes                                    | Derby            |                                  |
| <i>S.e. enterica</i> | Derby                | FLI1111 | B (O:4)                         | 1,4,[5],12:f,g:[1,2]      | no                                     | Derby            |                                  |
| <i>S.e. enterica</i> | Dublin               | NRL683  | D1 (O:9)                        | 1,9,12[VI]:g,p:-          | no                                     | Moscow           | Naestved                         |
| <i>S.e. enterica</i> | Dublin               | NRL684  | D1 (O:9)                        | 1,9,12[VI]:g,p:-          | no                                     | Naestved         | Dublin                           |
| <i>S.e. enterica</i> | Dublin               | NRL703  | D1 (O:9)                        | 1,9,12[VI]:g,p:-          | no                                     | Naestved         | Dublin                           |
| <i>S.e. enterica</i> | Dublin               | NRL704  | D1 (O:9)                        | 1,9,12[VI]:g,p:-          | no                                     | Naestved         | Dublin                           |
| <i>S.e. enterica</i> | Dublin (Bovisaloral) | NRL915  | D1 (O:9)                        | 1,9,12[VI]:g,p:-          | no                                     | Naestved         | Dublin                           |
| <i>S.e. enterica</i> | Dublin (rough)       | NRL904  | D1 (O:9)                        | 1,9,12[VI]:g,p:-          | no                                     | Naestved         | Dublin                           |
| <i>S.e. enterica</i> | Enteritidis          | FLI95   | D1 (O:9)                        | 1,9,12:g,m:-              | no                                     | Blegdam          | Enteritidis                      |
| <i>S.e. enterica</i> | Enteritidis          | NRL685  | D1 (O:9)                        | 1,9,12:g,m:-              | no                                     | Nitra            | Enteritidis                      |
| <i>S.e. enterica</i> | Enteritidis          | NRL875  | D1 (O:9)                        | 1,9,12:g,m:-              | no                                     | Belgdam          | Enteritidis                      |
| <i>S.e. enterica</i> | Gallinarum           | FLI151  | D1 (O:9)                        | 1,9,12:-                  | yes                                    | Gallinarum       |                                  |

Table 6. Cont.

| Species              | Serovar           | Strain  | Results of classical Serotyping |                           | Results of microarray based Serotyping |             |                                  |
|----------------------|-------------------|---------|---------------------------------|---------------------------|----------------------------------------|-------------|----------------------------------|
|                      |                   |         | Serogroup                       | Antigenic Formula         | Unique Pattern                         | Serovar     | Alternative Serovar <sup>a</sup> |
| <i>S.e. enterica</i> | Gallinarum        | FL155   | D1 (O:9)                        | 1,9,12:-                  | yes                                    | Gallinarum  |                                  |
| <i>S.e. enterica</i> | Gallinarum        | FL1969  | D1 (O:9)                        | 1,9,12:-                  | yes                                    | Gallinarum  |                                  |
| <i>S.e. enterica</i> | Goldcoast         | NRL852  | C2-C3 (O:8)                     | 6,8:r:l,w                 | yes                                    | Goldcoast   |                                  |
| <i>S.e. enterica</i> | Goldcoast         | FL1990  | C2-C3 (O:8)                     | 6,8:r:l,w                 | yes                                    | Goldcoast   |                                  |
| <i>S.e. enterica</i> | Hadar             | FL1636  | C2-C3 (O:8)                     | 6,8:z10:e,n,x             | yes                                    | Hadar       |                                  |
| <i>S.e. enterica</i> | Hadar             | FL1638  | C2-C3 (O:8)                     | 6,8:z10:e,n,x             | yes                                    | Hadar       |                                  |
| <i>S.e. enterica</i> | Hadar             | FL1672  | C2-C3 (O:8)                     | 6,8:z10:e,n,x             | yes                                    | Hadar       |                                  |
| <i>S.e. enterica</i> | Havana            | FL1607  | G (O:13)                        | 1,13,23:f,g,[s]-          | yes                                    | Havanna     |                                  |
| <i>S.e. enterica</i> | Havana            | FL1575  | G (O:13)                        | 1,13,23:f,g,[s]-          | yes                                    | Havana      |                                  |
| <i>S.e. enterica</i> | Indiana           | NRL872  | B (O:4)                         | 1,4,12:z:1,7              | no                                     | Kiambu      | Indiana                          |
| <i>S.e. enterica</i> | Infantis          | NRL718  | C1 (O:7)                        | 6,7,14:r:1,5              | yes                                    | Infantis    |                                  |
| <i>S.e. enterica</i> | Infantis          | NRL822  | C1 (O:7)                        | 6,7,14:r:1,5              | yes                                    | Infantis    |                                  |
| <i>S.e. enterica</i> | Infantis          | FL1630  | C1 (O:7)                        | 6,7,14:r:1,5              | yes                                    | Infantis    |                                  |
| <i>S.e. enterica</i> | Infantis          | FL1761  | C1 (O:7)                        | 6,7,14:r:1,5              | yes                                    | Infantis    |                                  |
| <i>S.e. enterica</i> | Infantis (R-form) | FL1546  | C1 (O:7)                        | 6,7,14:r:1,5              | yes                                    | Infantis    |                                  |
| <i>S.e. enterica</i> | Kasenyi           | NRL878  | P (O:38)                        | 38:e,h:1,5                | yes                                    | Kasenyi     |                                  |
| <i>S.e. enterica</i> | Kedougou          | FL1515  | G (O:13)                        | 1,13,23:i:l,w             | yes                                    | Kedougou    |                                  |
| <i>S.e. enterica</i> | Kedougou          | NRL1022 | G (O:13)                        | 1,13,23:i:l,w             | yes                                    | Kedougou    |                                  |
| <i>S.e. enterica</i> | Litchfield        | FL11218 | C2-C3 (O:8)                     | 6,8:l,v:1,2               | yes                                    | Litchfield  |                                  |
| <i>S.e. enterica</i> | Livingstone       | FL1720  | C1 (O:7)                        | 6,7,14:d:l,w              | yes                                    | Livingstone |                                  |
| <i>S.e. enterica</i> | London            | NRL700  | E1 (O:3,10)                     | 3,{10}{15}:l,v:1,6        | yes                                    | London      |                                  |
| <i>S.e. enterica</i> | London            | NRL849  | E1 (O:3,10)                     | 3,{10}{15}:l,v:1,6        | yes                                    | London      |                                  |
| <i>S.e. enterica</i> | Manhattan         | FL1662  | C2-C3 (O:8)                     | 6,8:d:1,5                 | yes                                    | Manhattan   |                                  |
| <i>S.e. enterica</i> | Mbandaka          | FL1534  | C1 (O:7)                        | 6,7,14:z10:e,n,z15        | yes                                    | Mbandaka    |                                  |
| <i>S.e. enterica</i> | Minnesota         | NRL814  | L (O:21)                        | 21:b:e,n,x                | yes                                    | Minnesota   |                                  |
| <i>S.e. enterica</i> | Minnesota         | NRL839  | L (O:21)                        | 21:b:e,n,x                | yes                                    | Minnesota   |                                  |
| <i>S.e. enterica</i> | Montevideo        | NRL930  | C1 (O:7)                        | 6,7,14:g,m,[p],s:[1,2,7]  | yes                                    | Montevideo  |                                  |
| <i>S.e. enterica</i> | Montevideo        | FL1652  | C1 (O:7)                        | 6,7,14:g,m,[p],s:[1,2,7]  | yes                                    | Montevideo  |                                  |
| <i>S.e. enterica</i> | Muenchen          | NRL801  | C2-C3 (O:8)                     | 6,8:d:1,2                 | yes                                    | Muenchen    |                                  |
| <i>S.e. enterica</i> | Muenster          | FL1325  | E1 (O:3,10)                     | 3,{10}{15}{15,34}:e,h:1,5 | yes                                    | Muenster    |                                  |
| <i>S.e. enterica</i> | Ohio              | NRL882  | C1 (O:7)                        | 6,7,14:b:l,w              | yes                                    | Ohio        |                                  |
| <i>S.e. enterica</i> | Oranienburg       | FL1429  | C1 (O:7)                        | 6,7,14:m,t:[z57]          | yes                                    | Oranienburg |                                  |
| <i>S.e. enterica</i> | Panama            | FL1604  | D1 (O:9)                        | 1,9,12:l,v:1,5            | no                                     | Koessen     | Panama                           |
| <i>S.e. enterica</i> | Panama            | FL1411  | D1 (O:9)                        | 1,9,12:l,v:1,5            | no                                     | Panama      | Koessen                          |
| <i>S.e. enterica</i> | Panama            | FL1413  | D1 (O:9)                        | 1,9,12:l,v:1,5            | no                                     | Panama      | Koessen                          |
| <i>S.e. enterica</i> | Paratyphi B       | FL1588  | B (O:4)                         | 1,4,[5],12:b:1,2          | yes                                    | Paratyphi B |                                  |
| <i>S.e. enterica</i> | Paratyphi B       | FL1590  | B (O:4)                         | 1,4,[5],12:b:1,2          | yes                                    | Paratyphi B |                                  |
| <i>S.e. enterica</i> | Pomona            | FL1700  | M (O:28)                        | 28:y:1,7                  | yes                                    | Pomona      |                                  |
| <i>S.e. enterica</i> | Saintpaul         | FL1344  | B (O:4)                         | 1,4,[5],12:e,h:1,2        | yes                                    | Saintpaul   |                                  |
| <i>S.e. enterica</i> | Saintpaul         | FL1423  | B (O:4)                         | 1,4,[5],12:e,h:1,2        | yes                                    | Saintpaul   |                                  |
| <i>S.e. enterica</i> | Sandiego          | NRL987  | C1 (O:7)                        | 1,4,[5],12:e,h:e,n,z15    | yes                                    | Sandiego    |                                  |
| <i>S.e. enterica</i> | Senftenberg       | NRL682  | E4 (O:1,3,19)                   | 1,3,19:g,[s],t:-          | no                                     | Westhampton | Senftenberg                      |
| <i>S.e. enterica</i> | Tennessee         | FL1347  | C1 (O:7)                        | 6,7,14:z29:[1,2,7]        | yes                                    | Tennessee   |                                  |
| <i>S.e. enterica</i> | Tennessee         | FL1606  | C1 (O:7)                        | 6,7,14:z29:[1,2,7]        | yes                                    | Tennessee   |                                  |
| <i>S.e. enterica</i> | Thompson          | FL1658  | C1 (O:7)                        | 6,7,14:k:1,5              | yes                                    | Thompson    |                                  |
| <i>S.e. enterica</i> | Typhimurium       | FL1598  | B (O:4)                         | 1,4,[5],12:i:1,2          | yes                                    | Typhimurium |                                  |
| <i>S.e. enterica</i> | Typhimurium       | NRL990  | B (O:4)                         | 1,4,[5],12:i:1,2          | yes                                    | Typhimurium |                                  |

**Table 6. Cont.**

| Species              | Serovar                     | Strain  | Results of classical Serotyping |                   | Results of microarray based Serotyping |             |                                  |
|----------------------|-----------------------------|---------|---------------------------------|-------------------|----------------------------------------|-------------|----------------------------------|
|                      |                             |         | Serogroup                       | Antigenic Formula | Unique Pattern                         | Serovar     | Alternative Serovar <sup>a</sup> |
| <i>S.e. enterica</i> | Typhimurium                 | NRL729  | B (O:4)                         | 1,4,[5],12:i:1,2  | yes                                    | Typhimurium |                                  |
| <i>S.e. enterica</i> | Typhimurium                 | NRL737  | B (O:4)                         | 1,4,[5],12:i:1,2  | yes                                    | Typhimurium |                                  |
| <i>S.e. enterica</i> | Typhimurium                 | FLI617  | B (O:4)                         | 1,4,[5],12:i:1,2  | yes                                    | Typhimurium |                                  |
| <i>S.e. enterica</i> | Typhimurium                 | NRL990  | B (O:4)                         | 1,4,[5],12:i:1,2  | yes                                    | Typhimurium |                                  |
| <i>S.e. enterica</i> | Typhimurium                 | NRL993  | B (O:4)                         | 1,4,[5],12:i:1,2  | yes                                    | Typhimurium |                                  |
| <i>S.e. enterica</i> | Typhimurium                 | NRL1000 | B (O:4)                         | 1,4,[5],12:i:1,2  | yes                                    | Typhimurium |                                  |
| <i>S.e. enterica</i> | Typhimurium var. Copenhagen | NRL797  | B (O:4)                         | 1,4,12:i:1,2      | yes                                    | Typhimurium |                                  |
| <i>S.e. enterica</i> | Typhimurium var. Copenhagen | NRL912  | B (O:4)                         | 1,4,12:i:1,2      | yes                                    | Typhimurium |                                  |
| <i>S.e. enterica</i> | Typhimurium var. Copenhagen | FLI1033 | B (O:4)                         | 1,4,12:i:1,2      | yes                                    | Typhimurium |                                  |
| <i>S.e. enterica</i> | Virchow                     | FLI640  | C1 (O:7)                        | 6,7,14:r:1,2      | yes                                    | Virchow     |                                  |
| <i>S.e. enterica</i> | Virchow                     | FLI649  | C1 (O:7)                        | 6,7,14:r:1,2      | yes                                    | Virchow     |                                  |

<sup>a</sup>tested isolate generated a serogenotyping pattern which is shared by multiple serovars.

Results were analyzed by the PatternMatch software and compared with the results of classical serotyping performed by the National Reference Laboratory for Salmonellosis in cattle at the Friedrich-Loeffler-Institute (NRL, FLI, Jena, Germany).  
doi:10.1371/journal.pone.0046489.t006

strength to the probes. Finally, due to the high correlation between theoretical and real experiments, we conclude that the described serogenotyping assay will also correctly detect other *Salmonella* serovars.

A similar approach to the system described in this study was published by Franklin and colleagues in 2011 [13]. In this study, the labeling procedure is divided into two principal steps. The first step is a multiplex PCR targeting several regions of the *Salmonella* genome which are important for serogenotyping (i.e. *wzy*, *wzx*, *fliC*, *fliB*). In the second step, short SSELO primers (sequence-specific end labeling of oligonucleotides, [33]) bind specifically to the target regions in the multiplex PCR products and are elongated with single biotin-labeled dideoxynucleoside triphosphate molecules (biotin-ddCTP, biotin-ddGTP and biotin-ddUTP). The incorporation of these molecules also terminates any further elongation. During the microarray hybridization, the 3' end labeled SSELO primers bind specifically to the complementary probes that are covalently attached on the array. Advantages of this method are the facility to recognize SNPs (single nucleotide polymorphism) and the potential to use DNA samples with low concentrations, i.e., DNA isolated directly from a field sample. However, a requirement for typing field samples is that the sample material contains only a single *Salmonella* serovar. For field samples containing more than one *Salmonella* strain, the serogenotype cannot be identified. Additionally, the labeling procedure is labor-intensive, complex and a target update would require, beside inclusion of new multiplex PCR primers, the introduction of new SSELO primer for detection on the microarray. With regard to the permanently increasing number of available sequences, the difficulties of up-dating and expanding this assay might pose a limitation for this concept.

A more recent method to identify *Salmonella* is a system using a microsphere-based liquid array [19,20]. This method uses a set of beads which are coupled with probes for one attribute within the antigenic formula of *Salmonella* serovars. While the method is highly sensitive and specific, a multitude of different beads is

required for every attribute within the antigenic formula (e.g., O-antigen). Therefore, at least three reactions have to be performed before obtaining the antigenic formula. A drawback of the method is the multiplex PCR used to amplify short DNA fragments which are then hybridized to the probes on the beads. Due to the inherent disadvantages of any multiplex PCR [34,35], the options are limited for a further expansion of the assay beyond the serovars it currently recognizes.

The described microarray based serogenotyping assay for *Salmonella* overcomes most of these bottlenecks. It is easy-to-use, an unlimited expandability and fully automated data analysis, making it an attractive platform for a widespread application. The multiplex primer extension reaction used for labeling is highly specific, but exhibits low sensitivity, due to linear (non-exponential) amplification. However, for typing colony material of a fast growing organism, such as *Salmonella*, this is no issue. The use of colony material instead of original field samples allows both, to obtain the necessary amount of DNA and to ensure pureness and clonality of cultures to be genotyped. Besides, the limited amplification can prove to be an advantage under routine conditions as the assay becomes less susceptible to contamination. Using a classic multiplex PCR, the sensitivity is very high, but contaminants will also be amplified to a detectable level because of the near-exponential kinetics of a PCR. This fact might cause difficulties in high-throughput routine laboratories.

In our approach, primers and their respective probe binding sites are very close to each other. The probability of secondary structures (e.g., hairpins) forming in short generated fragments is lower than in long fragments and this may increase signal intensity. Additionally, the use of single stranded DNA prevents the competition between probe and antisense strand and increases the probability of the single stranded amplicon binding to the probe. Labeling methods using biotin attached to primers were often used [36], but we assumed that, due to cross hybridizations of biotin labeled primer which are in relatively high concentrations, false positive signals will occur more often. In this study,

biotin labeled dUTP was used for internal labeling of the multitude of single stranded amplicons. This method prevents false positive signals due to unused primer which bind on empty probes. Another significant advantage of the described serogenotyping method is the economical and ready-to-use availability of all components, even in large scales. For DNA isolation, we used standard DNA isolation kits from Roche or Qiagen. Furthermore, it is conceivable that, after heating at 100°C and RNase treatment (assay sensitivity may decrease due to single stranded RNA which may trap primer used in the multiplex linear DNA amplification), the crude cell extract could be used directly with this assay. All substances for the linear multiplex PCR and the labeling process are available as HybPlus Kit (Alere Technologies, Germany). Due to the standardized availability of all components, this method can immediately be used for routine serogenotyping of *Salmonella*. Up to 96 samples can be analyzed simultaneously.

So far, the serogenotyping assay shows the limitation of the inability to discriminate between serogroup A (O:2) and serogroup D1 (O:9). This is due to the high sequence similarity within the *rfb* region between strains of both serogroups. Within the genome of serogroup A strains, the *rfb* region has been shown to be a minor modification of a serogroup D1 *rfb* region; it has a frameshift mutation that inactivates *tyv*, a sugar biosynthesis gene required for the biosynthesis of tyvelose [37]. Serogroup D1 strains have tyvelose as their O-antigen side chain sugar, whereas serogroup A strains have paratose, the substrate for tyvelose, as its side chain sugar. Thus, a small genetic change is responsible for a substantial O-antigen difference. Additional probes, including *bygA*, *bygD*, *sefA*, *sefB* and *sefC*, which were only described for serovar Enteritidis [38,39], also give positive signals for serovar Nitra. Additionally, *S. ser. Blegdam* (O9:g,m,q,-) showed an identical pattern on the microarray, but in this case the antigenic formula is highly similar to *S. ser. Enteritidis* (O9:g,m,-). This result showed how closely related these serovars are to each other. A similar observation between the serogroups A and D1 were made for the serovars Dublin (O9:g,p,-) and Kiel (O2:g,p,-), where additional probes for *SeD\_A1100*, *SeD\_A1101* and *SeD\_A1102* were also positive with serovar Kiel. This observation may indicate a high degree of relationship between these two serovars. Furthermore, we assume a high genome sequence similarity between Panama (O9:l,v:1,5) and Koessen (O2:l,v:1,5) as the microarray pattern were also identical. Paratyphi A could be unambiguously identified due to the probes of intergenic region SSPAI. With the knowledge about the genotype of these described serovars a question arises: Is there a need to differentiate between serogroup D1 and A or between g,m and g,q/g,m,q (both a mutation variant of g,m)? Or should the Kauffmann-White Scheme be updated based on our knowledge of *Salmonella* genomics and the current role of serotyping (e.g., a first line typing method prior to modern molecular methods). Nevertheless, a future version of the assay aims to include probes to discriminate such important zoonotic pathogens as *S. ser. Enteritidis* and *S. ser. Dublin*. For this propose, genome databases (e.g., NCBI) are regularly screened for new *Salmonella* sequences.

In addition, all isolates (n = 34) in which resistance genes were found, were also tested phenotypically. A clear correlation between AMR genotype detected by the *Salmonella* array and the AMR phenotype was observed (Table 5, Table S2) for most genes. However, the genes *sul1* and *sul2* are known to mediate resistance to sulfamethoxazol, but in the study only co-trimoxazol, a mixture comprising trimethoprim and sulfamethoxazol, was tested. Strains that harbored only *sul* genes were found to be susceptible when being tested with co-trimoxazol. Resistance to co-trimoxazol was associated to the presence of a *sul* gene (*sul1*, *sul2* or *sul3*) combined

with a *dfi* gene (*dfiA1*, *dfiA12*, *dfiA13*, *dfiA14*, *dfiA15* or *dfiV*). Similar correlations between AMR pheno- and genotype were found in other studies using microarrays for *E. coli* and *Salmonella* [40,41]. In these studies, all probes and primers used in this study were already evaluated by testing phenotypic antimicrobial resistance in parallel.

Another interesting result was the detection of an extended-spectrum beta-lactamase (ESBL) gene, *ctxMI*, in *S. ser. Anatum* strain AMR07 (Table S2). This gene has previously been described several times for *Salmonella* species [42,43]. In one isolate, ampicillin resistance and a positive nitrocephin test were observed despite a negative genotyping result. For this observation, two explanations are possible: (a) the probe/primer combination of our assay did not bind on the known beta-lactamase gene due to random mutation(s) within the binding side of either the primer or the probe, or (b) the isolate carried a beta-lactamase gene which was not yet described for *Salmonella* and which therefore was not included into the *Salmonella* assay. Regarding the unexplained streptomycin resistances, it might be speculated that aminoglycoside modifying enzymes for which the corresponding genes were not covered by the array or efflux systems as known from other bacteria [44] might have played a role.

The study, with a panel of 105 different *Salmonella* isolates, demonstrates the high correlation between genotype classification by the serogenotyping assay and phenotype representation by the classical serotyping method. Approximately 90% of the strains were correctly identified (Table 6). The accuracy depends strongly on the underlying database used by the PatternMatch software, but any unknown serovar encountered can easily be included in the database and software upon conventional identification. The main drawback of the assay turned out to be the similarity of patterns between different *Salmonella* serovars, as described above. With the primer-probe design used here, we were not able to discriminate between these problematic strains, mainly because of the high sequence similarity in the target genes of serogroup A and D1. However, all these ambiguous strains are very rare in a clinical environment, each being reported less than 10 times worldwide during the last 10 years ([1], [www.cdc.gov/nczid/dfwed/PDFs/SalmonellaAnnualSummaryTables2009.pdf](http://www.cdc.gov/nczid/dfwed/PDFs/SalmonellaAnnualSummaryTables2009.pdf)), and additional probes can easily be introduced should a need arise, or should new sequence information become available.

Due to the absence of a probe which can determine the genetic loci of the O:5 epitope, the isolate *S. ser. Typhimurium* var. Copenhagen, which is O:5-negative by serotyping, was identified as *S. ser. Typhimurium*; this minor mistake was regarded as a correct hit.

Another minor limitation is that R- forms (rough forms) cannot be identified using the current array as observed in one isolate of Infantis. R- forms mainly result from mutations of genes within the lipopolysaccharides core [45]. Mutations within the genes *rfA* (glycosyltransferase), *galE* (UDP-galactose epimerase), or *galF* (UDP-glucose pyrophosphorylase) can cause an interruption of the biosynthesis of the lipopolysaccharides. No probes detecting such mutations were included to the array, and failure to identify R- forms regarded as minor issue.

The described assay for serogenotyping is the basis for a fast method to identify *Salmonella* serovars. We believe that the usage of this assay in a routine laboratory setting is warranted due to the high correlation between serotype and genotype. An advantage of the genotype as the basis for serovar identification is that phenotypic differences (e.g., R-forms that are difficult to analyze by classical serology) play no role. Furthermore, the serogenotyping assay could be used worldwide, where antisera are not available. In such areas, a *Salmonella* infection in livestock or

*Salmonella* contamination in food could be identified very quickly. *Salmonella* outbreaks could consequently be retraced to their origin. This microarray based assay is a powerful tool for epidemiological studies, as many samples can be analyzed rapidly and in parallel. For such cases, a point-of-care application represents an ideal standard. During an outbreak situation, this assay could be extremely helpful to identify the outbreak isolate including AMR genotype within hours after they are obtained as clonal serovar. Finally, an interlaboratory comparison in cooperation with several international reference centers will follow in the near future.

## Supporting Information

**Table S1 Probe-matching matrix used to construct the theoretical hybridization pattern of the fully sequenced strains listed in NCBI database.**

(XLSX)

**Table S2 Comparison of the AMR-genotype and AMR-phenotype of 34 *Salmonella* strains.**

(XLSX)

## References

- Anonymous (2010) The Community Summary Report on trends and sources of zoonoses, zoonotic agents and foodborne outbreaks in the European Union in 2008. *EFSA Journal* 8: 410 p.
- Grimont PA, Weill FX (2007) Antigenic formulae of the *Salmonella* serovars. Paris: Institut Pasteur: WHO Collaborating Centre for Reference and Research on *Salmonella*. 166 p.
- Anonymous (1934) The Genus *Salmonella* Lignières, 1900. *J Hyg (Lond)* 34: 333–350.
- Reeves PP, Wang L (2002) Genomic organization of LPS-specific loci. *Curr Top Microbiol Immunol* 264: 109–135.
- Samuel G, Reeves P (2003) Biosynthesis of O-antigens: genes and pathways involved in nucleotide sugar precursor synthesis and O-antigen assembly. *Carbohydr Res* 338: 2503–2519.
- Ballmer K, Korczak BM, Kuhnt P, Slickers P, Ehrlich R, et al. (2007) Fast DNA serotyping of *Escherichia coli* by use of an oligonucleotide microarray. *J Clin Microbiol* 45: 370–379.
- Masten BJ, Joys TM (1993) Molecular analyses of the *Salmonella* g... flagellar antigen complex. *J Bacteriol* 175: 5359–5365.
- McQuiston JR, Parrenas R, Ortiz-Rivera M, Gheesling L, Brenner F, et al. (2004) Sequencing and comparative analysis of flagellin genes *fliC*, *fliB*, and *fliA* from *Salmonella*. *J Clin Microbiol* 42: 1923–1932.
- Burnens AP, Stanley J, Sechter I, Nicolet J (1996) Evolutionary origin of a monophasic *Salmonella* serovar, 9,12:l,v:-, revealed by IS200 profiles and restriction fragment polymorphisms of the *fliB* gene. *J Clin Microbiol* 34: 1641–1645.
- Silverman M, Zieg J, Hilmen M, Simon M (1979) Phase variation in *Salmonella*: genetic analysis of a recombinational switch. *Proc Natl Acad Sci USA* 76: 391–395.
- Zieg J, Simon M (1980) Analysis of the nucleotide sequence of an invertible controlling element. *Proc Natl Acad Sci USA* 77: 4196–4200.
- Anonymous (2007) Microbiology of food and animal feeding stuffs – horizontal method for the detection of *Salmonella* (EN ISO 6579:2002/Amd 1:2007). Geneva: International Organization for Standardization. 40 p.
- Franklin K, Lingohr EJ, Yoshida C, Anjum M, Bodrossy L, et al. (2011) Rapid genosereotyping tool for classification of *Salmonella* serovars. *J Clin Microbiol* 49: 2954–2965.
- Kim S, Frye JG, Hu J, Fedorka-Cray PJ, Gautam R, et al. (2006) Multiplex PCR-based method for identification of common clinical serotypes of *Salmonella enterica* subsp. *enterica*. *J Clin Microbiol* 44: 3608–3615.
- Muñoz N, Diaz-Osorio M, Moreno J, Sánchez-Jiménez M, Cardona-Castro N (2010) Development and evaluation of a multiplex real-time polymerase chain reaction procedure to clinically type prevalent *Salmonella enterica* serovars. *J Mol Diagn* 12: 220–225.
- Ben-Darif E, Jury F, De Pinna E, Threlfall EJ, Bolton FJ, et al. (2010) Development of a multiplex primer extension assay for rapid detection of *Salmonella* isolates of diverse serotypes. *J Clin Microbiol* 48: 1055–1060.
- Malorny B, Bunge C, Guerra B, Prietz S, Helmuth R (2007) Molecular characterisation of *Salmonella* strains by an oligonucleotide multiprobe microarray. *Mol Cell Probes* 21: 56–65.
- Sukhnanand S, Alcaine S, Warnick LD, Su WL, Hof J, et al. (2005) DNA sequence-based subtyping and evolutionary analysis of selected *Salmonella enterica* serotypes. *J Clin Microbiol* 43: 3688–3698.
- Fitzgerald C, Collins M, van Duyn S, Mikoleit M, Brown T, et al. (2007) Multiplex, bead-based suspension array for molecular determination of common *Salmonella* serogroups. *J Clin Microbiol* 45: 3323–3334.
- McQuiston JR, Waters RJ, Dinsmore BA, Mikoleit ML, Fields PI (2010) Molecular determination of H antigens of *Salmonella* by use of a microsphere-based liquid array. *J Clin Microbiol* 49: 565–573.
- Wattiau P, Weijers T, Andreoli P, Schliker C, Veken HV, et al. (2008) Evaluation of the Premi Test *Salmonella*, a commercial low-density DNA microarray system intended for routine identification and typing of *Salmonella enterica*. *Int J Food Microbiol* 123: 293–298.
- McClelland M, Sanderson KE, Clifton SW, Latreille P, Porwollik S, et al. (2004) Comparison of genome degradation in Paratyphi A and Typhi, human-restricted serovars of *Salmonella enterica* that cause typhoid. *Nat Genet* 36: 1268–1274.
- Fricke WF, Mammel MK, McDermott PF, Tartera C, White DG, et al. (2011) Comparative genomics of 28 *Salmonella enterica* isolates: evidence for CRISPR-mediated adaptive sublineage evolution. *J Bacteriol* 193: 3556–3568.
- Rahn K, De Grandis SA, Clarke RC, McEwen SA, Galán JE, et al. (1992) Amplification of an *invA* gene sequence of *Salmonella typhimurium* by polymerase chain reaction as a specific method of detection of *Salmonella*. *Mol Cell Probes* 6: 271–279.
- Geue L, Schares S, Mintel B, Conraths FJ, Müller E, et al. (2010) Rapid microarray-based genotyping of enterohemorrhagic *Escherichia coli* serotype O156:H25/H-/Hnt isolates from cattle and clonal relationship analysis. *Appl Environ Microbiol* 76: 5510–5519.
- Tosini F, Visca P, Luzzi I, Dionisi AM, Pezzella C, et al. (1998) Class 1 integron-borne multiple-antibiotic resistance carried by IncFI and IncL/M plasmids in *Salmonella enterica* serotype Typhimurium. *Antimicrob Agents Chemother* 42: 3053–3058.
- Mazel D (2006) Integrons: agents of bacterial evolution. *Nat Rev Microbiol* 4: 608–620.
- Monecke S, Coombs G, Shore AC, Coleman DC, Akpaka P, et al. (2011) A field guide to pandemic, epidemic and sporadic clones of methicillin-resistant *Staphylococcus aureus*. *PLoS One* 6: e17936.
- Ruettger A, Feige J, Slickers P, Schubert E, Morrè SA, et al. (2011) Genotyping of *Chlamydia trachomatis* strains from culture and clinical samples using an *ompA*-based DNA microarray assay. *Mol Cell Probes* 25: 19–27.
- Aslani MM, Bouzari S (2009) Characterization of virulence genes of non-O157 Shiga toxin-producing *Escherichia coli* isolates from two provinces of Iran. *Jpn J Infect Dis* 62: 16–19.
- Aslani MM, Alikhani MY (2009) Serotypes of enteropathogenic *Escherichia coli* isolated from children under 5 years of age. *Iranian J Publ Health* 38: 70–77.
- Sachse K, Laroucau K, Hotzel H, Schubert E, Ehrlich R, et al. (2008) Genotyping of *Chlamydia psittaci* using a new DNA microarray assay based on sequence analysis of *ompA* genes. *BMC Microbiol* 8: 63.
- Kostic T, Weilharter A, Rubino S, Delogu G, Uzzau S, et al. (2007) A microbial diagnostic microarray technique for the sensitive detection and identification of pathogenic bacteria in a background of nonpathogens. *Anal Biochem* 360: 244–254.
- Henegariu O, Heerema NA, Dlouhy SR, Vance GH, Vogt PH (1997) Multiplex PCR: critical parameters and step-by-step protocol. *BioTechniques* 23: 504–511.
- Markoulatos P, Sifakas N, Moncany M (2002) Multiplex polymerase chain reaction: a practical approach. *J Clin Lab Anal* 16: 47–51.

## Acknowledgments

We thank Matthew Mikoleit (CDC, Atlanta, USA) for support with the *Salmonella* reference strains and proof reading of the manuscript, Rene S. Hendriksen and Christina Aaby Svendsen (DTU Food, Denmark) for the *S. ser. Typhi* DNA as generous gift, Rob Burris (Alere, Uganda) and Carly Scott for proof reading the manuscript, Gisela Rössler and Ines Engelmann (Alere, Jena, Germany) for excellent technical support, Elke Müller for organizing the *Salmonella* culture collection, Stefan Schwarz (FLI, Neustadt-Mariensee, Germany), Paul Barrow (University of Nottingham Sutton Bonington Campus, Leicestershire, UK) and Lutz Geue (FLI Wusterhausen, Germany) for different *Salmonella* reference strains as generous gift, Susann Schubert and Anja Gottwald (Technical University of Dresden, Dresden, Germany) for AMR phenotyping, Christina Braun for continuous support as well as for proof reading of the manuscript, and Eugen Ermantraut (Alere, Jena, Germany) for supporting this work.

## Author Contributions

Performed the experiments: SDB SK. Analyzed the data: SDB AZ PS. Contributed reagents/materials/analysis tools: SDB AZ PS. Wrote the paper: SDB SM RE UM.

36. Järvinen AK, Laakso S, Piiparinen P, Aittakorpi A, Lindfors M, et al. (2009) Rapid identification of bacterial pathogens using a PCR- and microarray-based assay. *BMC Microbiol* 9: 161.
37. Liu D, Verma NK, Romana LK, Reeves PR (1991) Relationships among the *rfb* regions of *Salmonella* serovars A, B, and D. *J Bacteriol* 173: 4814–4819.
38. Clouthier SC, Müller KH, Doran JL, Collinson SK, Kay WW (1993) Characterization of three fimbrial genes, *sefABC*, of *Salmonella enteritidis*. *J Bacteriol* 175: 2523–2533.
39. Ogunniyi AD, Kotlarski I, Morona R, Manning PA (1997) Role of SefA subunit protein of SEF14 fimbriae in the pathogenesis of *Salmonella enterica* serovar Enteritidis. *Infect Immun* 65: 708–717.
40. Anjum MF, Choudhary S, Morrison V, Snow LC, Mafura M, et al. (2011) Identifying antimicrobial resistance genes of human clinical relevance within *Salmonella* isolated from food animals in Great Britain. *J Antimicrob Chemother* 66: 550–559.
41. Szmolka A, Anjum MF, La Ragione RM, Kaszanyitzky EJ, Nagy B (2011) Microarray based comparative genotyping of gentamicin resistant *Escherichia coli* strains from food animals and humans. *Vet Microbiol* 156: 110–118.
42. Batchelor M, Hopkins K, Threlfall EJ, Clifton-Hadley FA, Stallwood AD, et al. (2005) bla(CTX-M) genes in clinical *Salmonella* isolates recovered from humans in England and Wales from 1992 to 2003. *Antimicrob Agents Chemother* 49: 1319–1322.
43. Uma B, Prabhakar K, Rajendran S, Lakshmi Sarayu Y (2010) Prevalence of extended spectrum beta lactamases in *Salmonella* species isolated from patients with acute gastroenteritis. *Indian J Gastroenterol* 29: 201–204.
44. Chan YY, Tan TM, Ong YM, Chua KL (2004) BpeAB-OprB, a multidrug efflux pump in *Burkholderia pseudomallei*. *Antimicrob Agents Chemother* 48: 1128–1135.
45. Lindberg AA, Hellerqvist CG (1980) Rough mutants of *Salmonella typhimurium*: immunochemical and structural analysis of lipopolysaccharides from *rfaH* mutants. *J Gen Microbiol* 116: 25–32.
